# Supplementary material for: Multimodal antibacterial potency of newly designed and synthesized Schiff's/Mannich based coumarin derivatives: potential inhibitors of bacterial DNA gyrase and biofilm production
Source: Royal Society of Chemistry journal article supplement (doi:10.1039/d4ra05756b), 2024-01-01
Supplement: d4ra05756b1.pdf [file d4ra05756b1.pdf]

## Supplementary materials

### **Multimodal Antibacterial Potency of Novel Schiff / Mannich Based Coumarin Derivatives Targeting Bacterial DNA Gyrase and Biofilm Inhibition: An *In-Vitro* and *In-Silico* Investigations.**

Kakarla Pakeeraiah<sup>a</sup>, Pragyan Paramita Swain<sup>b</sup>, Alaka Sahoo<sup>a,c,d</sup>, Preetesh Kumar Panda<sup>a</sup>, Monalisa Mahapatra<sup>a</sup>, Suvadeep Mal<sup>a</sup>, Rajesh Kumar Sahoo<sup>b</sup>, Pratap Kumar Sahu<sup>\*e</sup>, Sudhir Kumar Paidesetty<sup>\*a</sup>

<sup>a</sup> Medicinal Chemistry Research Laboratory, School of Pharmaceutical Sciences, Siksha 'O' Anusandhan Deemed to be University, Bhubaneswar 751003, Odisha, India.

<sup>b</sup> Centre for Biotechnology, School of Pharmaceutical Sciences, Siksha 'O' Anusandhan Deemed to be University, Bhubaneswar 751003, Odisha, India.

<sup>c</sup>Department of Skin & VD, Institute of Medical Sciences&SUM Hospital, Siksha 'O' Anusandhan Deemed to be University, Bhubaneswar 751003, Odisha, India.

<sup>d</sup> Research and Development Division, Salixiras Research Private Limited, Bhubaneswar, Odisha, India.

<sup>e</sup> Department of Pharmacology, School of Pharmaceutical Sciences, Siksha 'O' Anusandhan Deemed to be University, Bhubaneswar 751003, Odisha, India.

**\*Corresponding authors: [psudhirkumar@soa.ac.in](mailto:psudhirkumar@soa.ac.in); [pratapsahu@soa.ac.in](mailto:pratapsahu@soa.ac.in)**

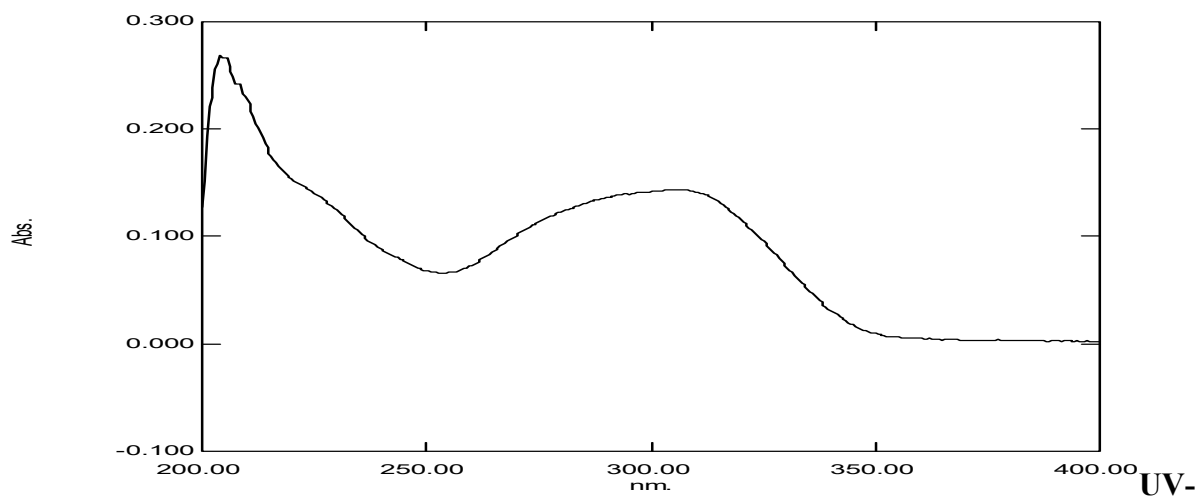

**Fig. S1. Visible spectra of compound 5a**

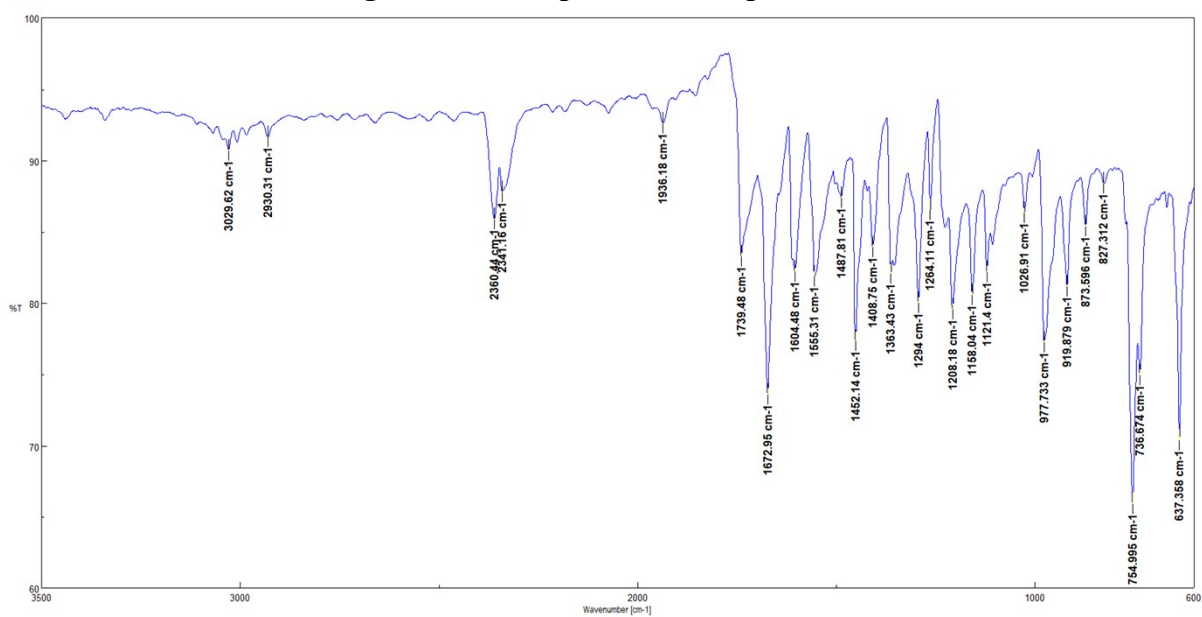

**Fig. S2. FTIR Spectra of compound 5a**

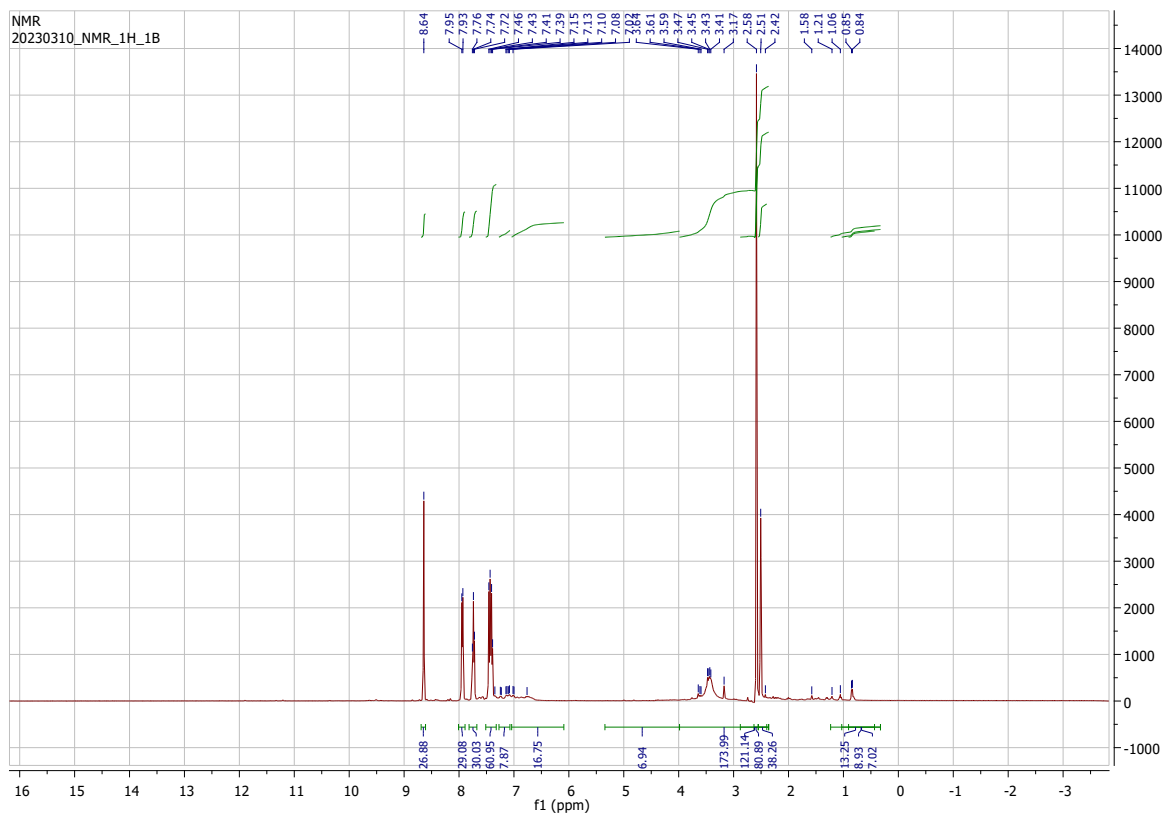

Fig. S3.  $^1\text{H}$  NMR Spectra of compound 5a

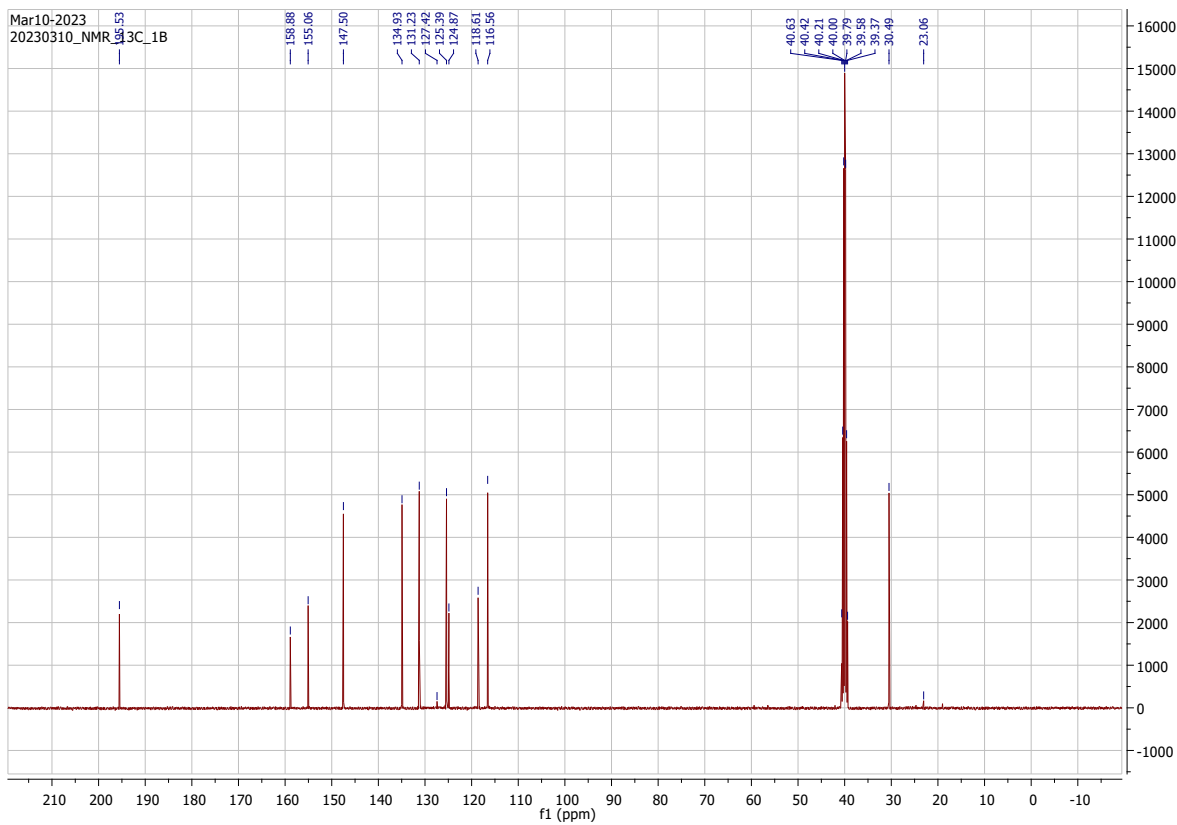

Fig. S4.  $^{13}\text{C}$  NMR Spectra of compound 5a

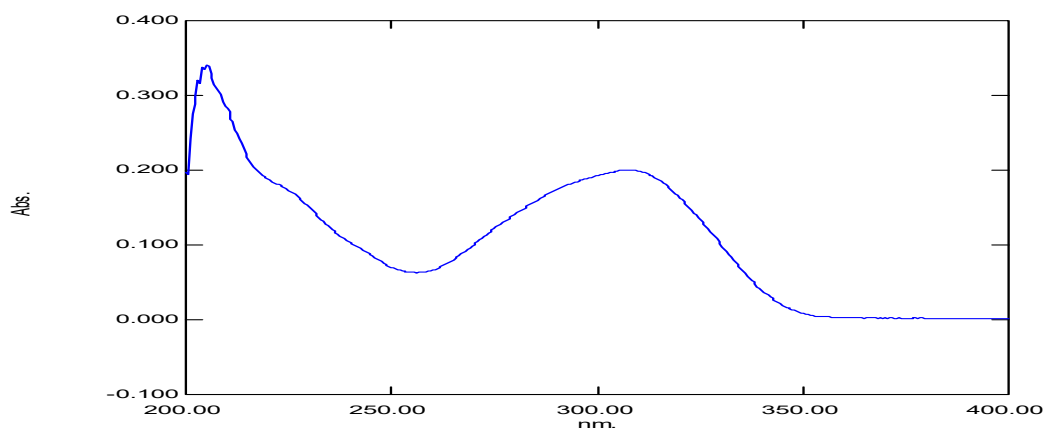

**Fig. S5. UV-Visible spectra of compound 5b**

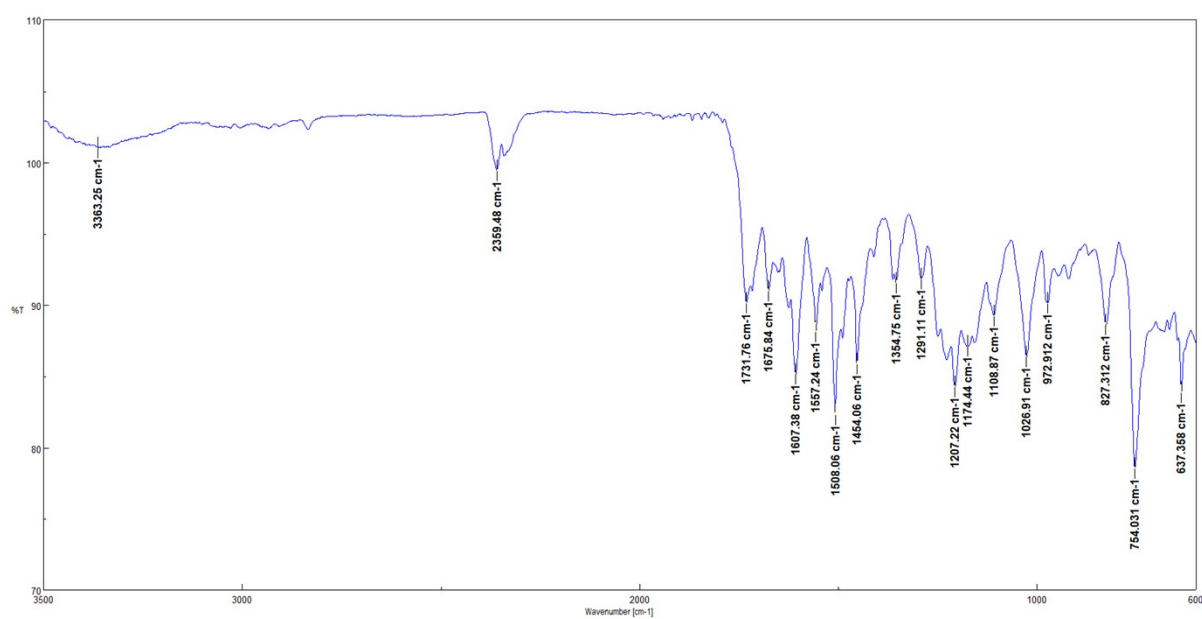

**Fig. S6. FTIR Spectra of compound 5b**

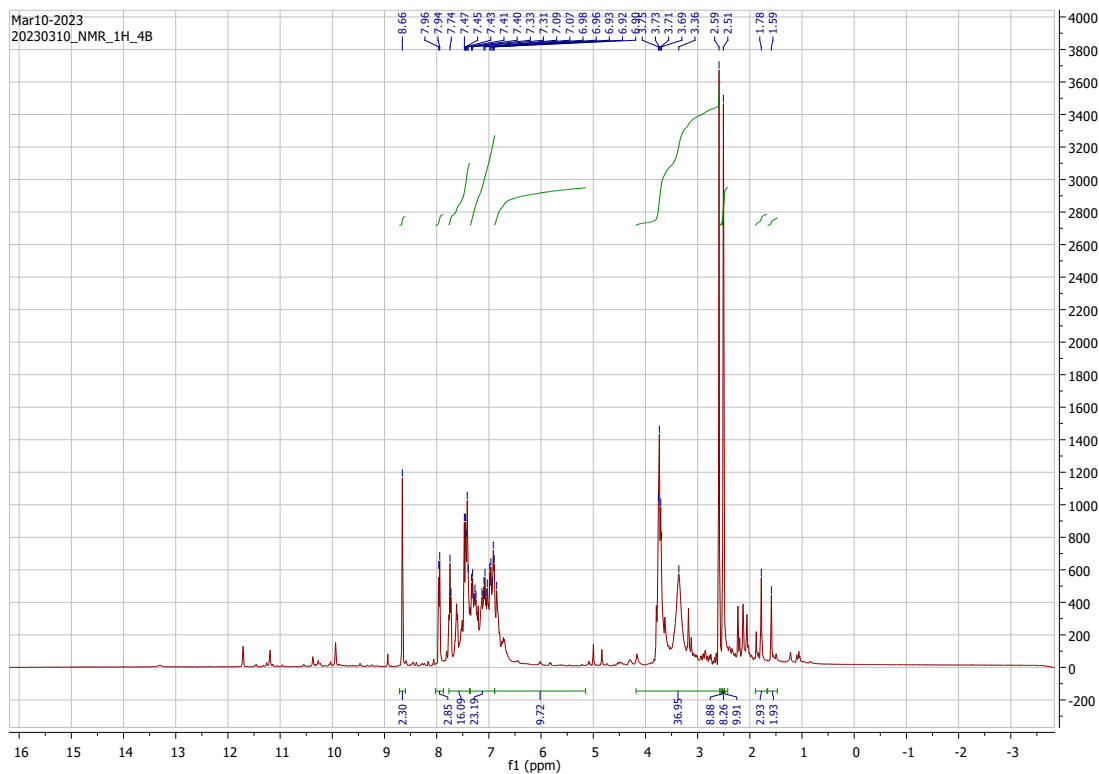

Fig. S7.  $^1\text{H}$  NMR Spectra of compound 5b

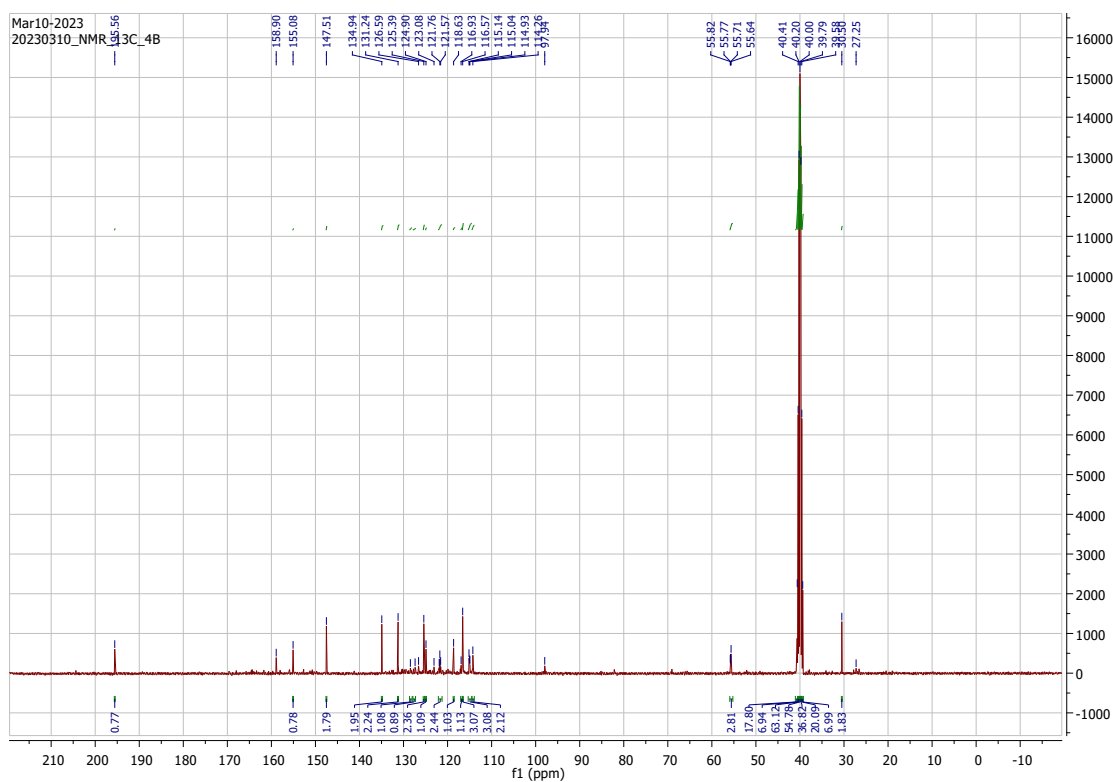

Fig. S8.  $^{13}\text{C}$  NMR Spectra of compound 5b

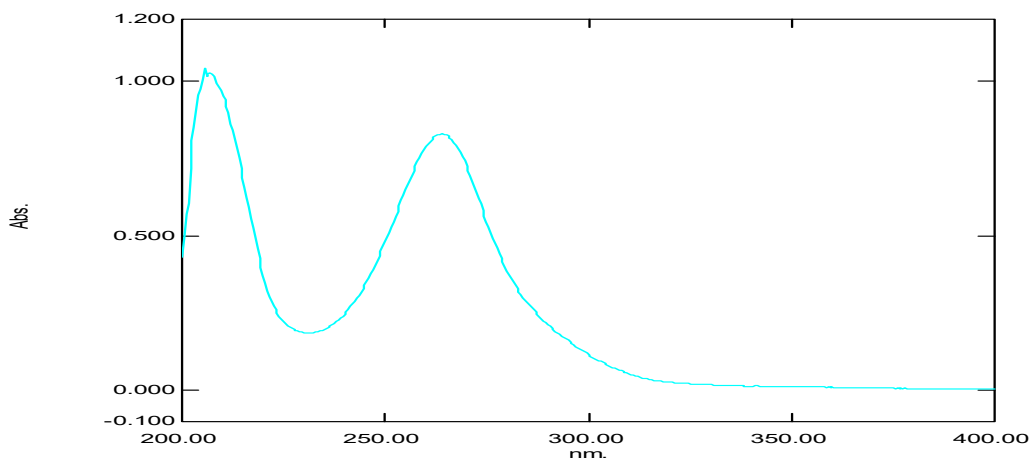

Fig. S9. UV-Visible spectra of compound 5c

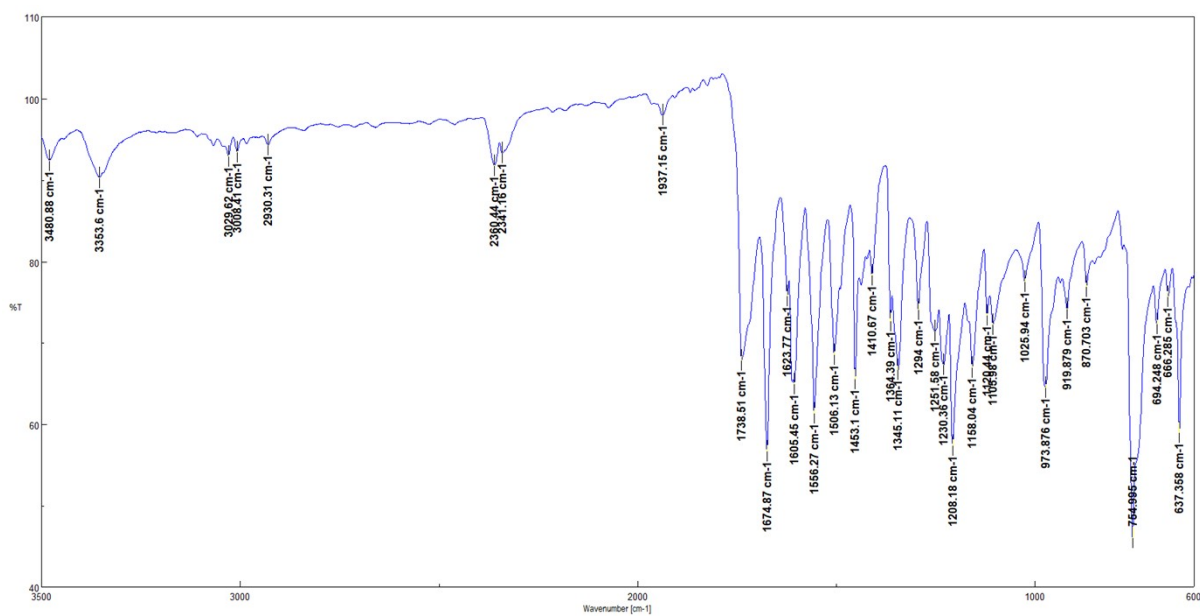

Fig. S10. FTIR Spectra of compound 5c

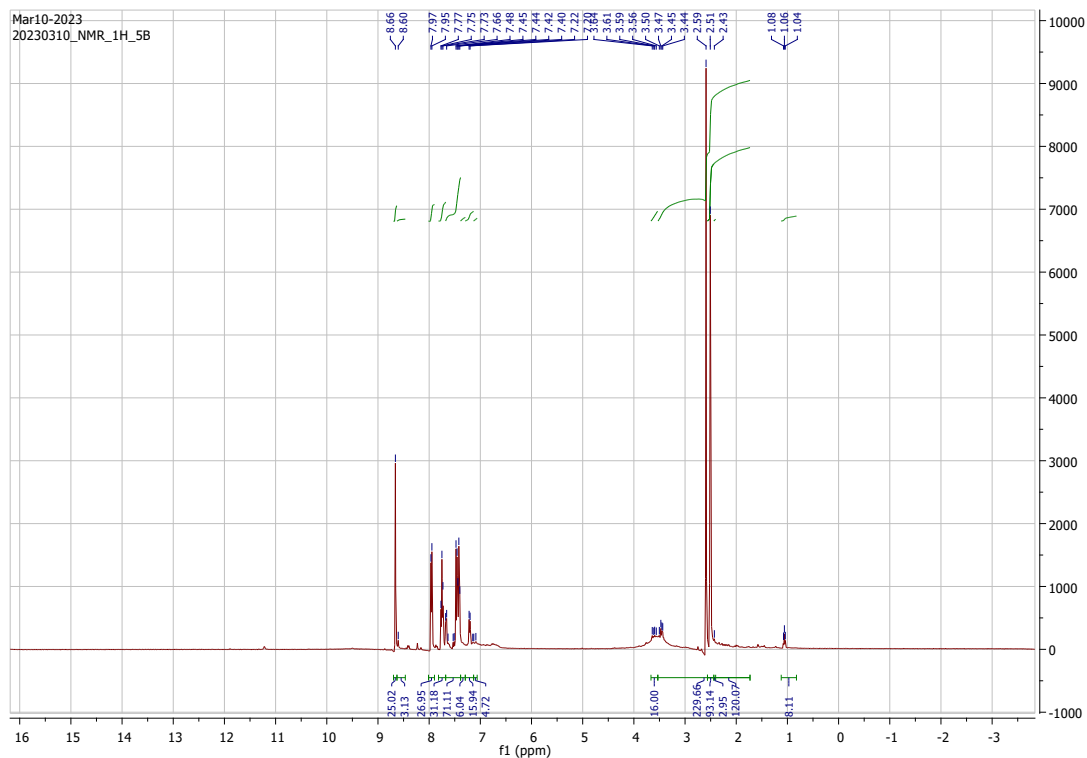

Fig. S11.  $^1\text{H}$  NMR Spectra of compound 5c

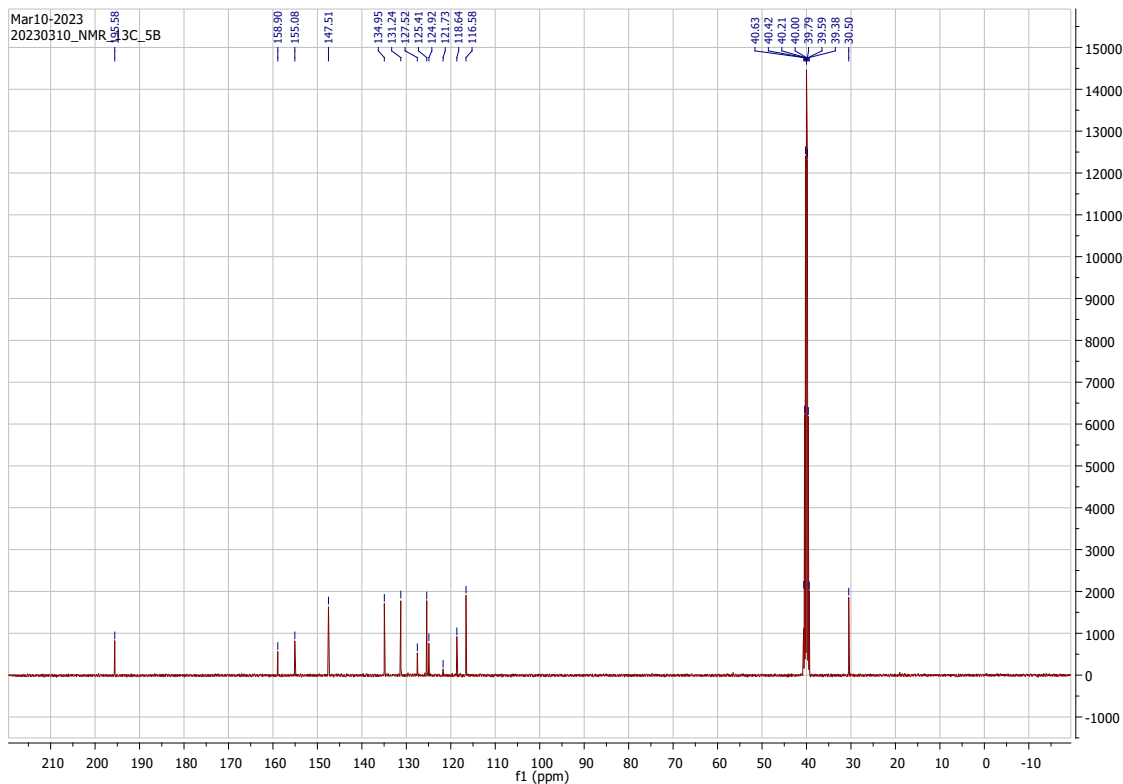

Fig. S12.  $^{13}\text{C}$  NMR Spectra of compound 5c

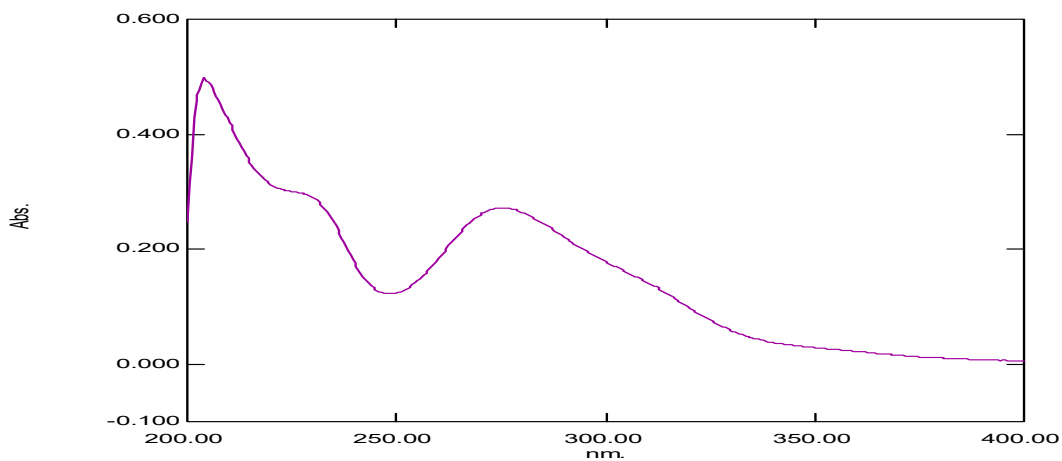

**Fig. S13. UV-Visible spectra of compound 5d**

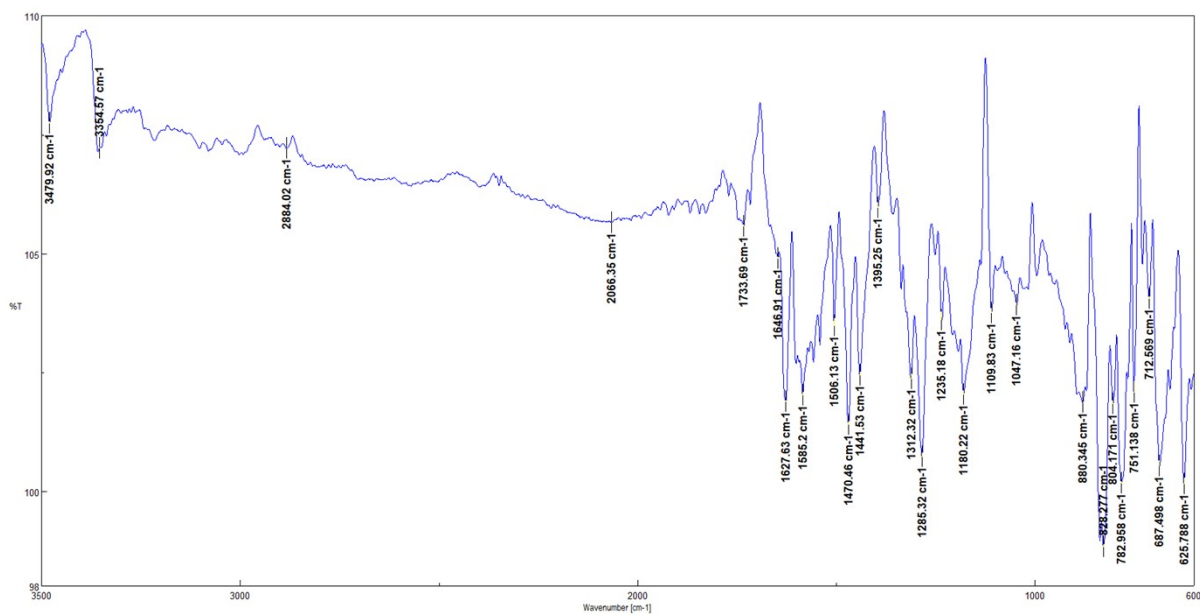

**Fig. S14. FTIR Spectra of compound 5d**



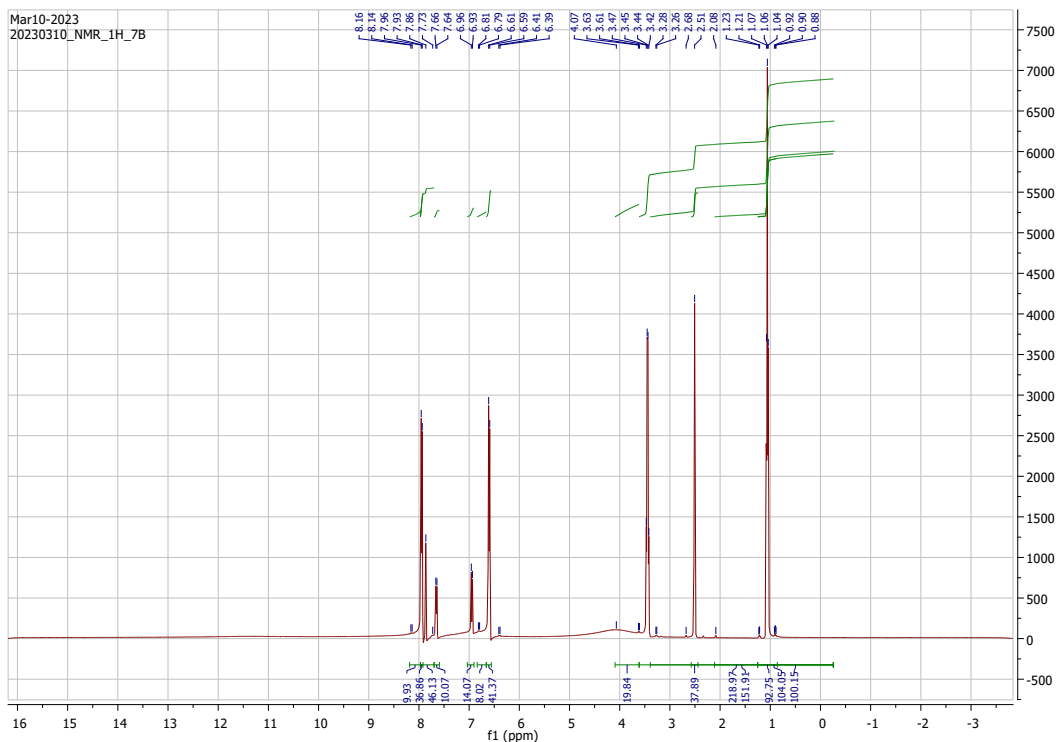

**Fig. S15.  $^1\text{H}$  NMR Spectra of compound 5d**

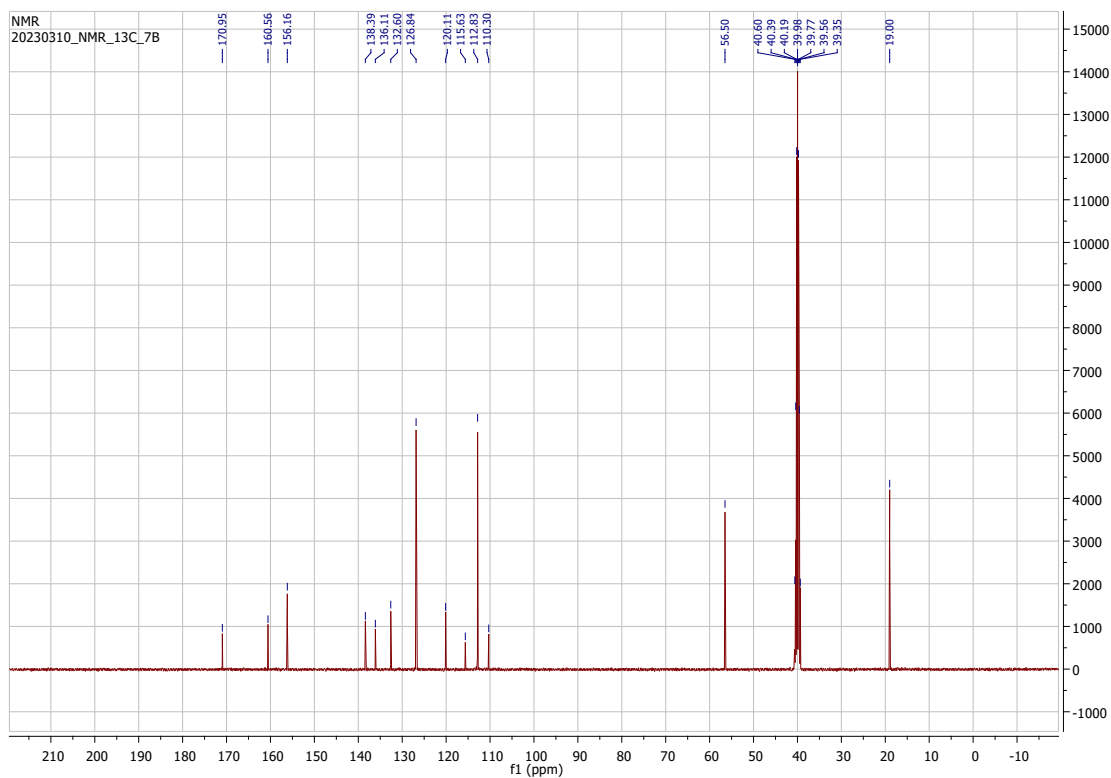

**Fig. S16.  $^{13}\text{C}$  NMR Spectra of compound 5d**

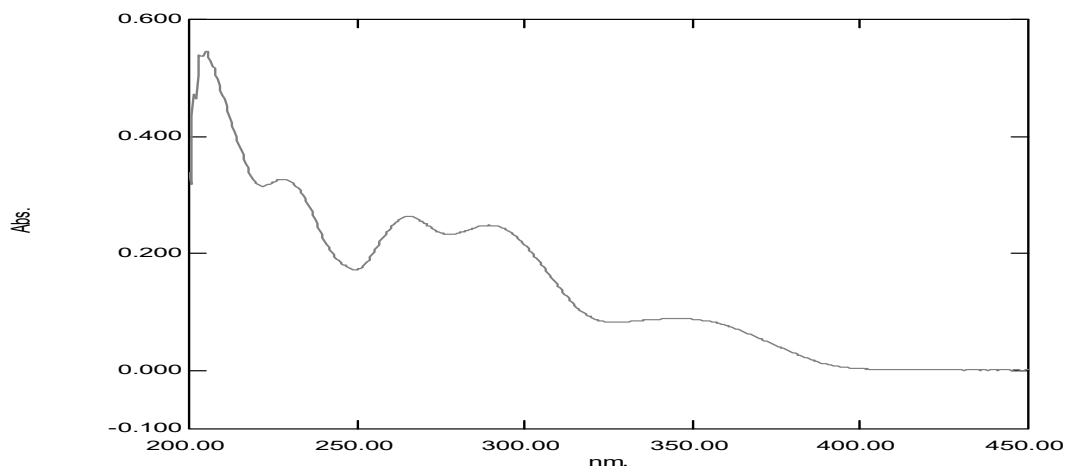

Fig. S17. UV-Visible spectra of compound 5e

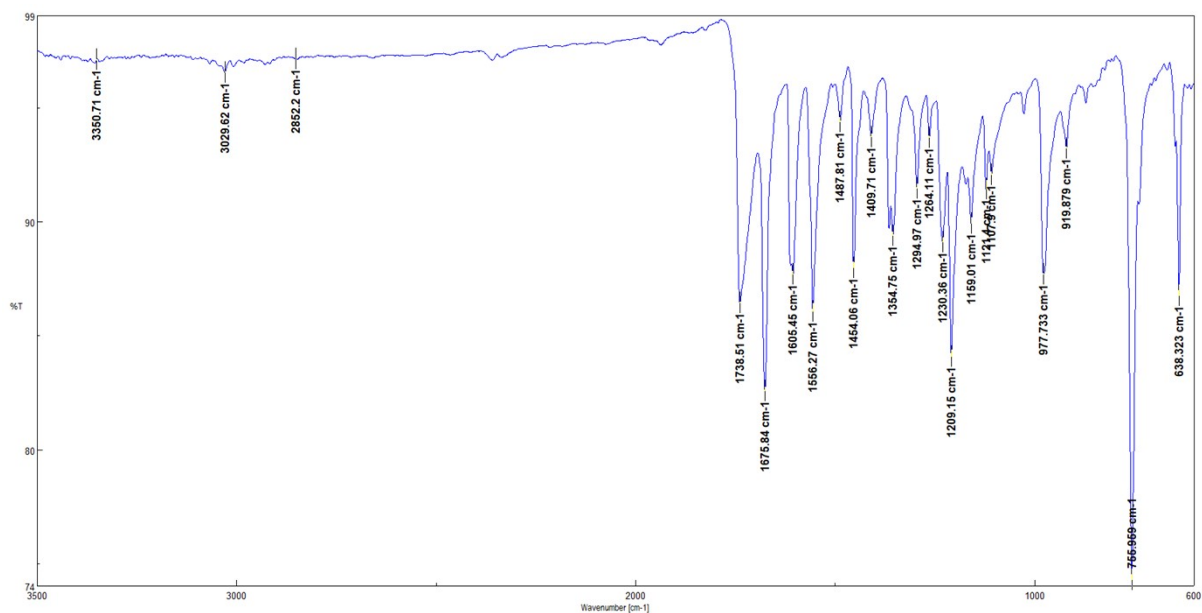

Fig. S18. FTIR Spectra of compound 5e

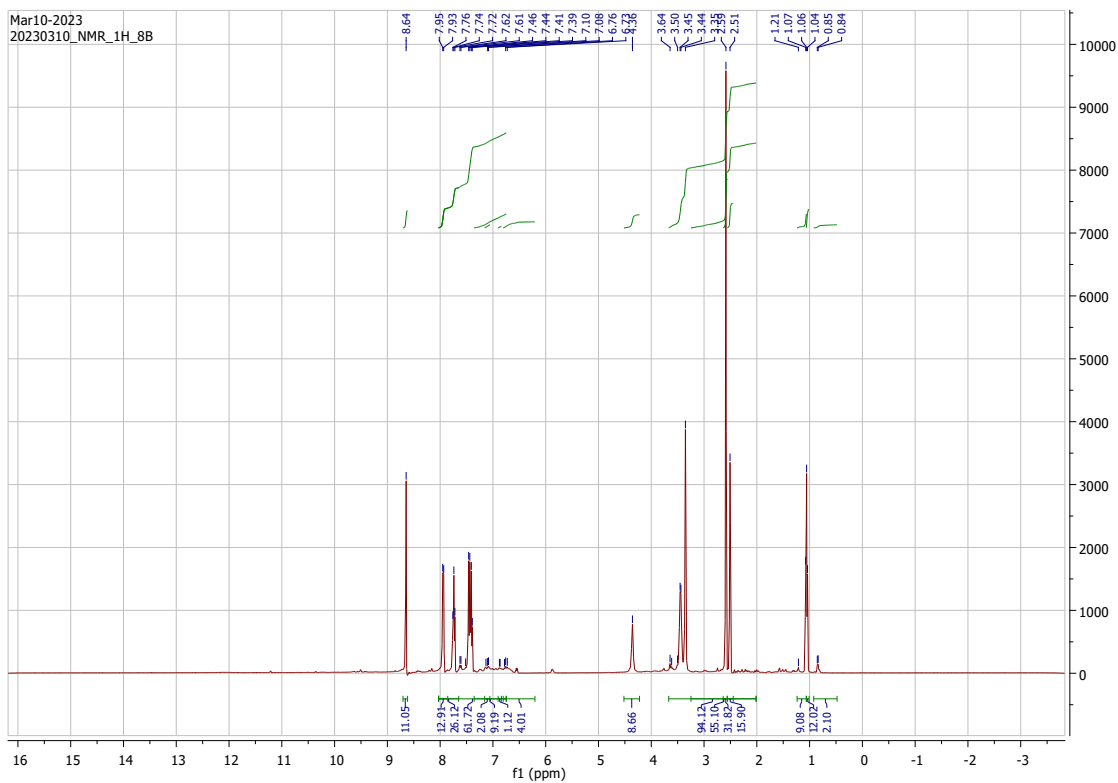

Fig. S19.  $^1\text{H}$  NMR Spectra of compound 5e

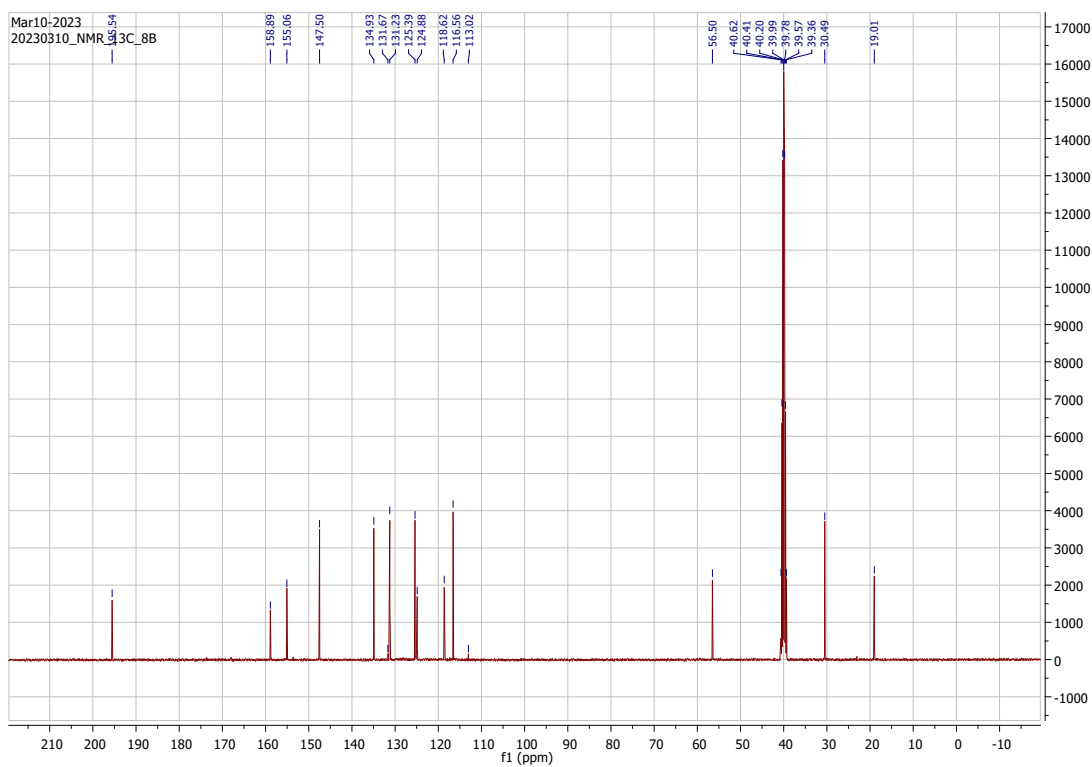

Fig. S20.  $^{13}\text{C}$  NMR Spectra of compound 5e

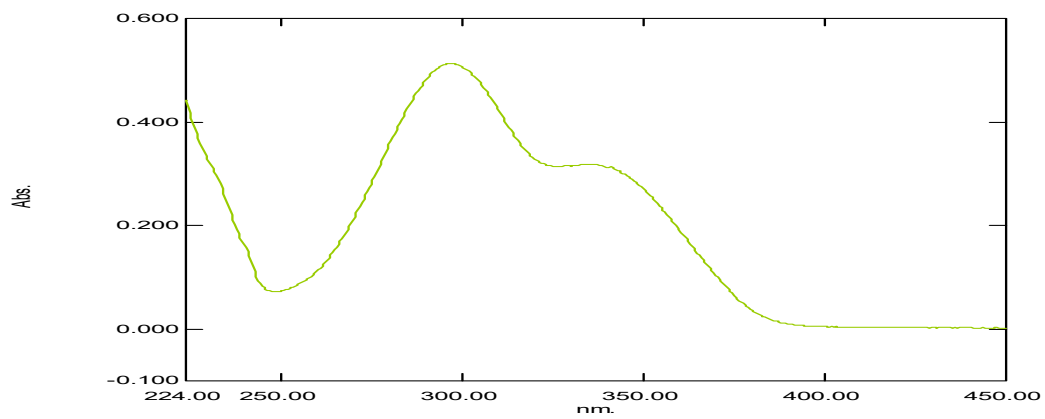

**Fig. S21. UV-Visible spectra of compound 5f**

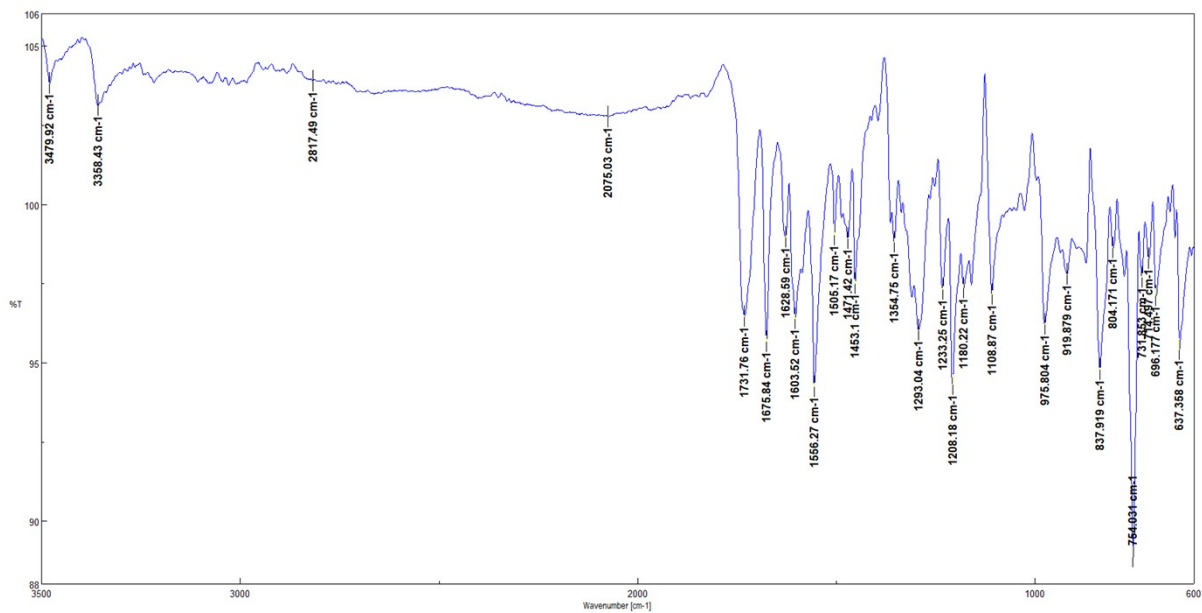

**Fig. S22. FTIR Spectra of compound 5f**

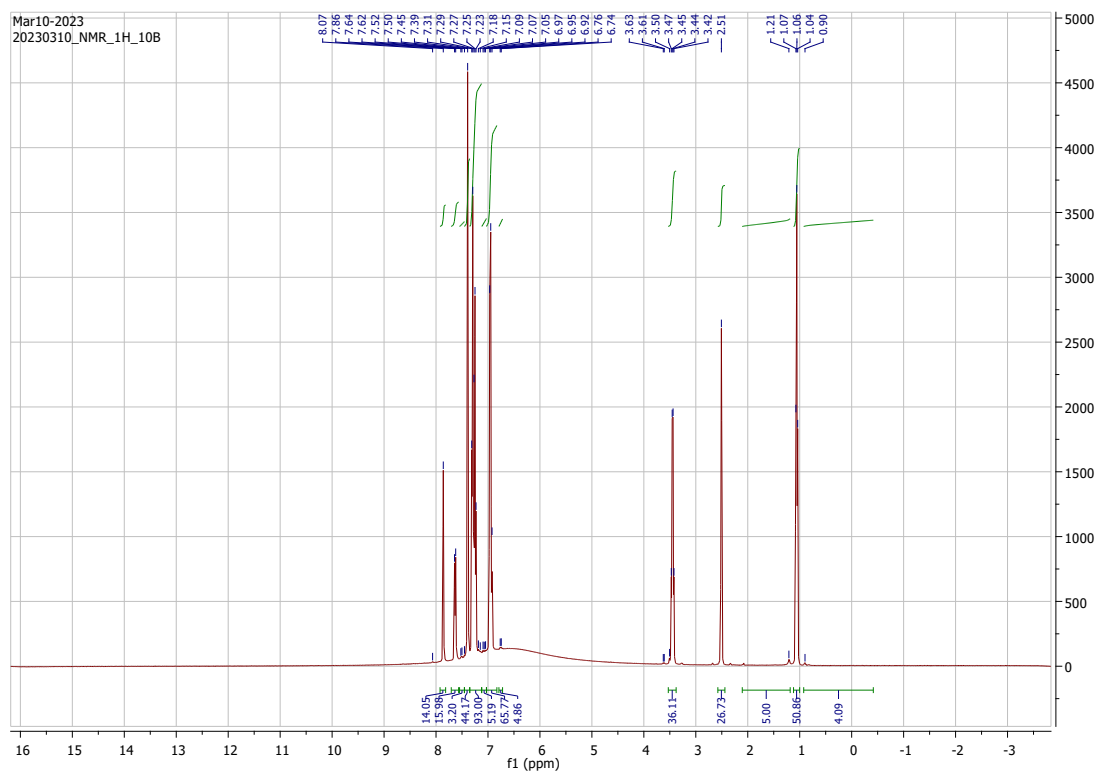

**Fig. S23.  $^1\text{H}$  NMR Spectra of compound 5f**

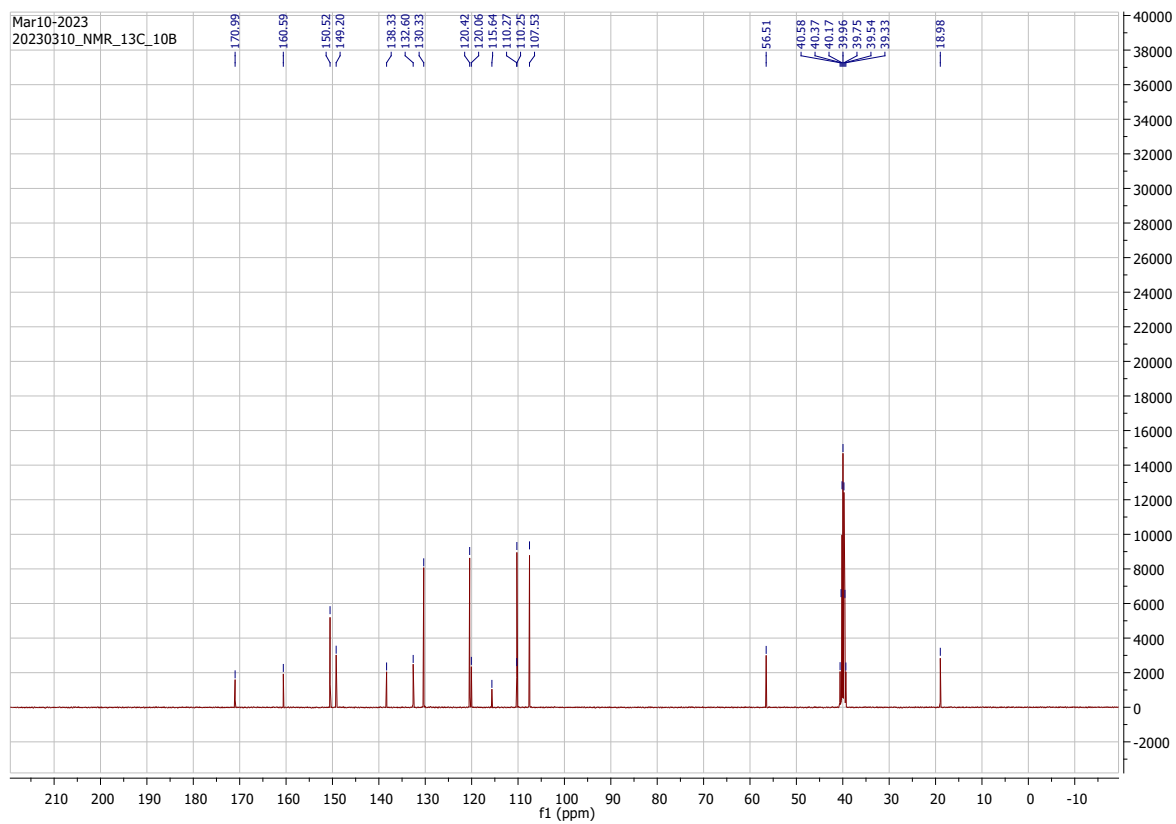

**Fig. S24.  $^{13}\text{C}$  NMR Spectra of compound 5f**

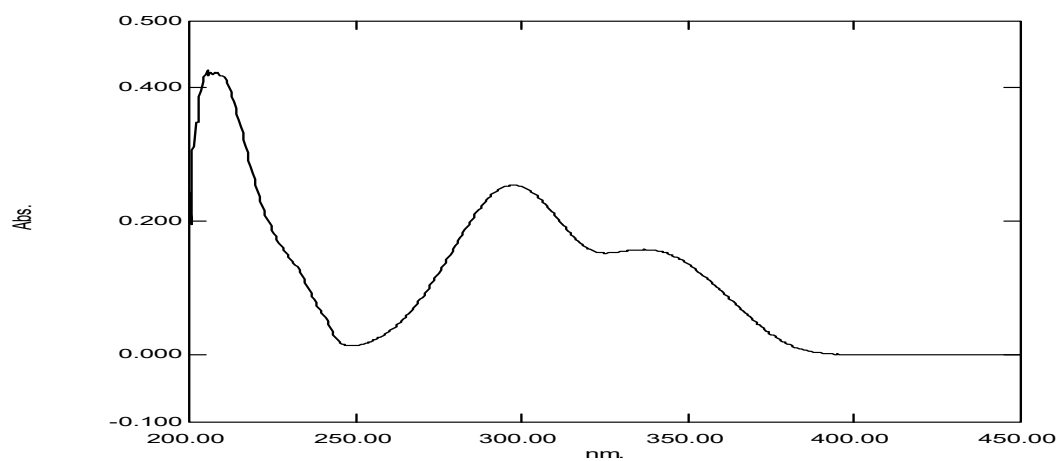

**Fig. S25. UV-Visible spectra of compound 5g**

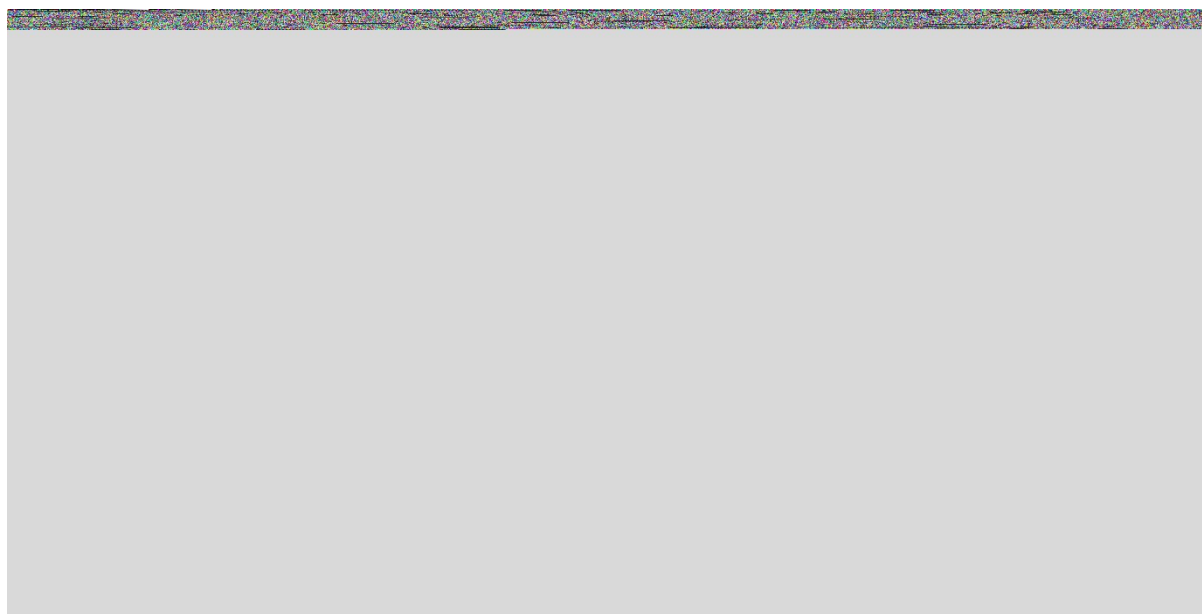

**Fig. S26. FTIR Spectra of compound 5g**

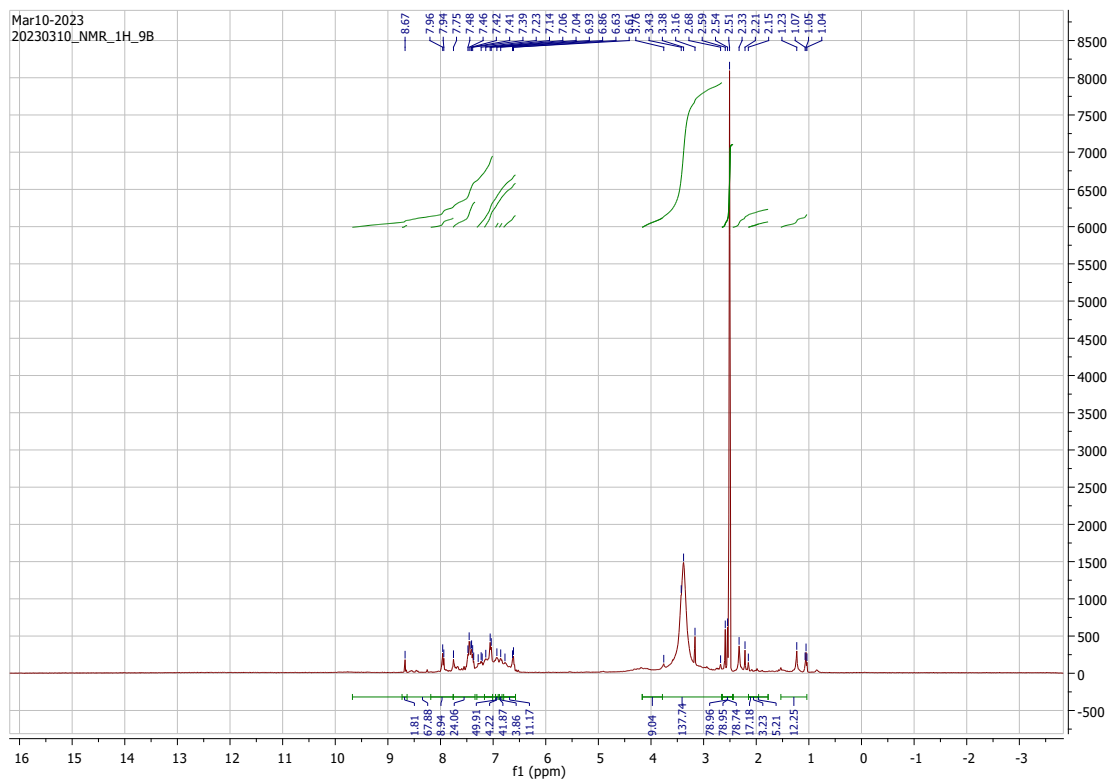

**Fig. S27.  $^1\text{H}$  NMR Spectra of compound 5g**

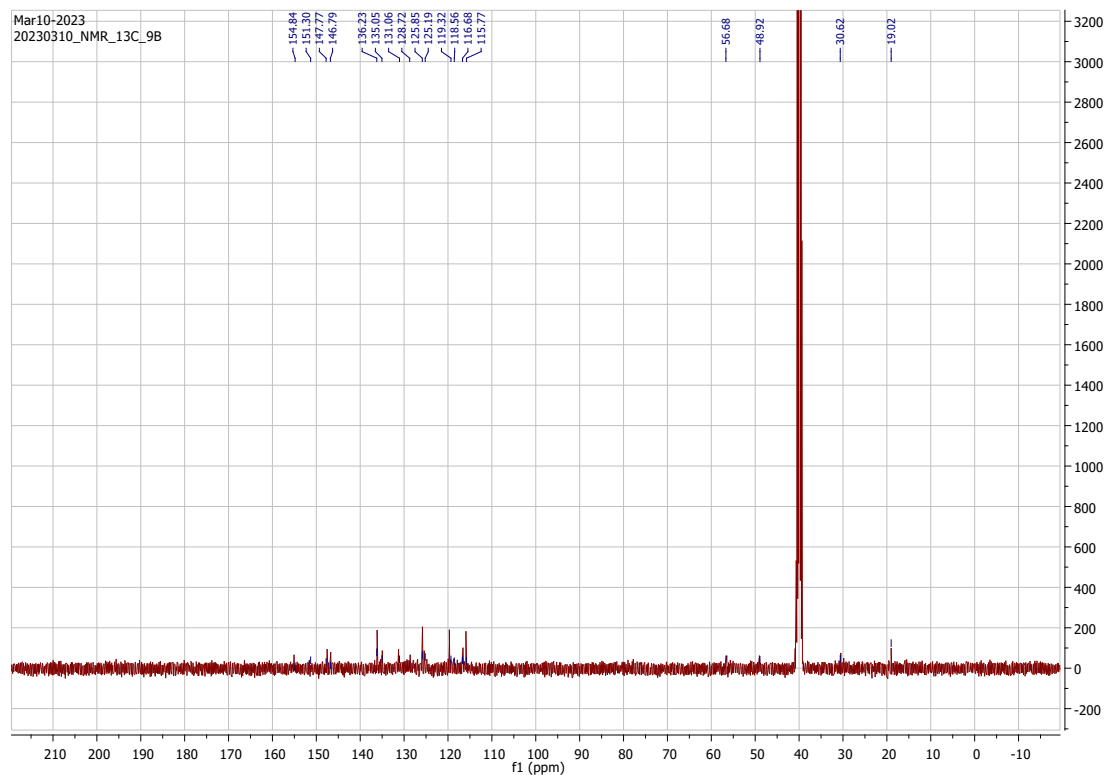

**Fig. S28  $^{13}\text{C}$  NMR Spectra of compound 5g**

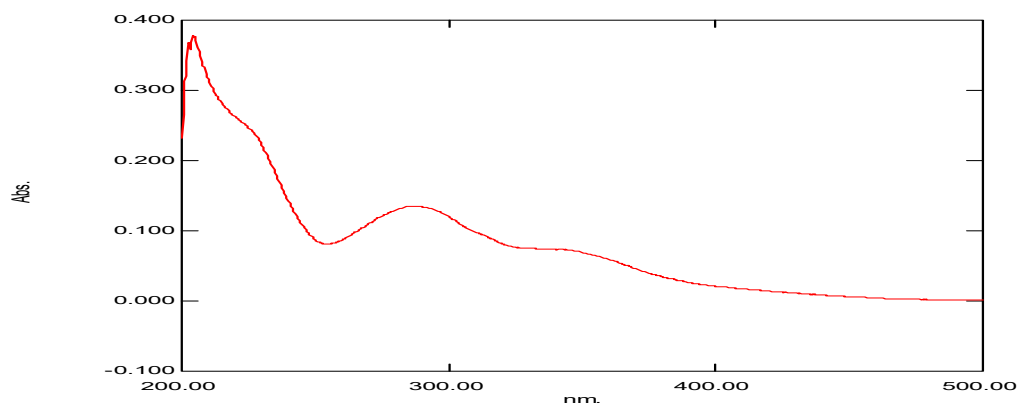

Fig. S29. UV-Visible spectra of compound 5h

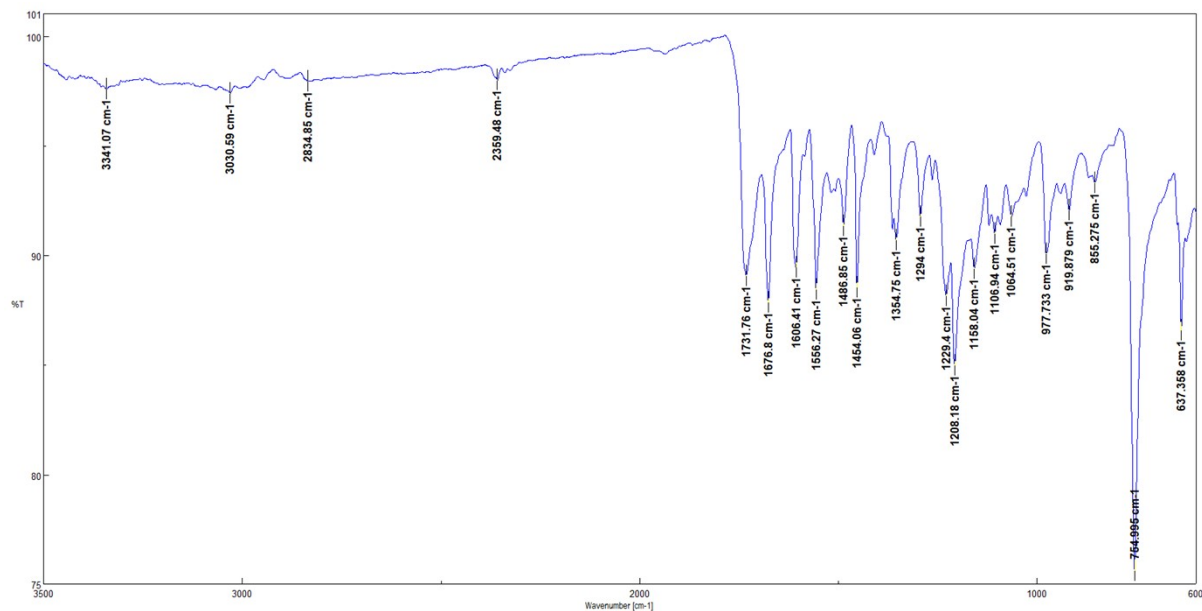

Fig. S30. FTIR Spectra of compound 5h



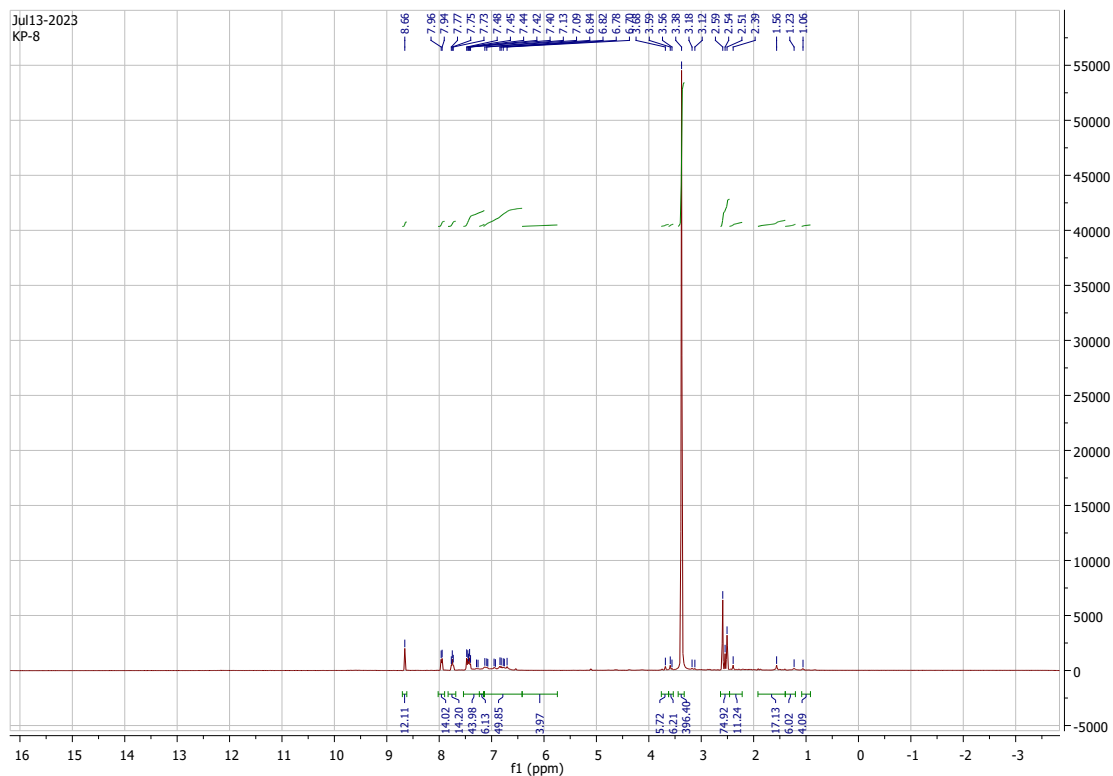

Fig. S31. <sup>1</sup>H NMR Spectra of compound 5h

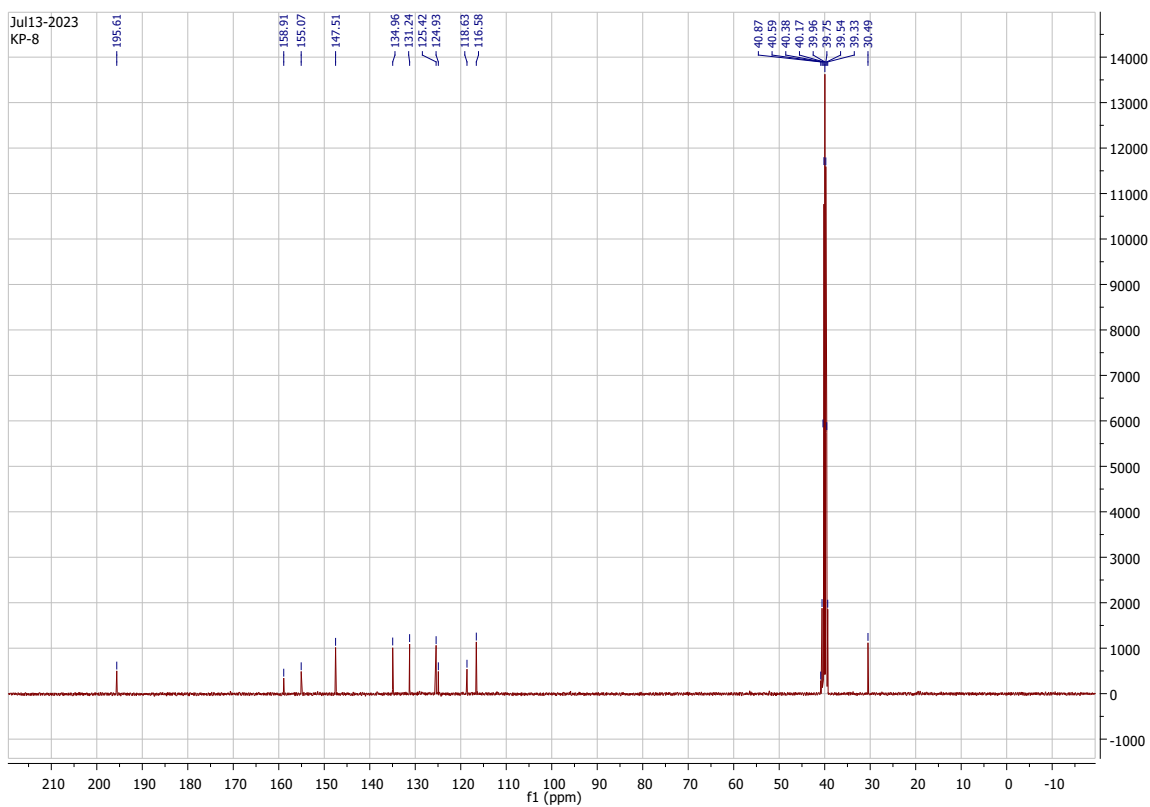

Fig. S32. <sup>13</sup>C NMR Spectra of compound 5h

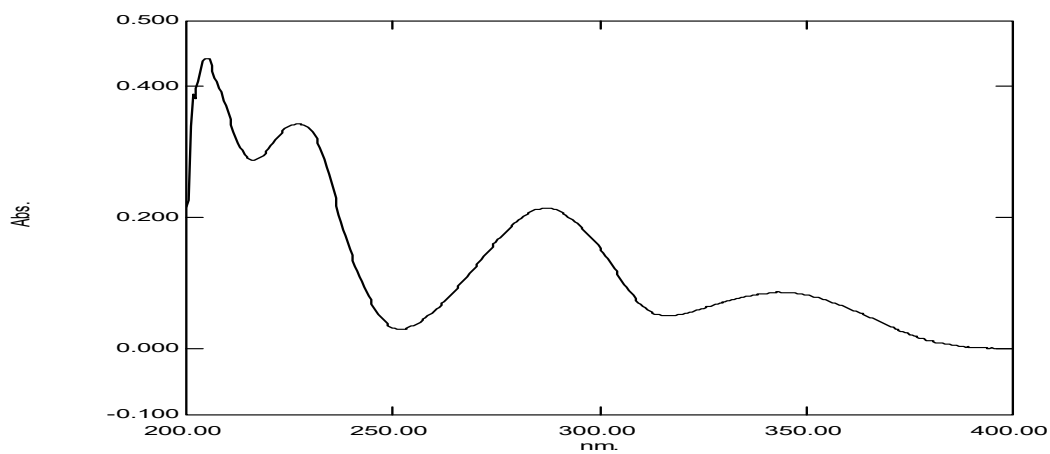

**Fig. S33. UV-Visible spectra of compound 5i**

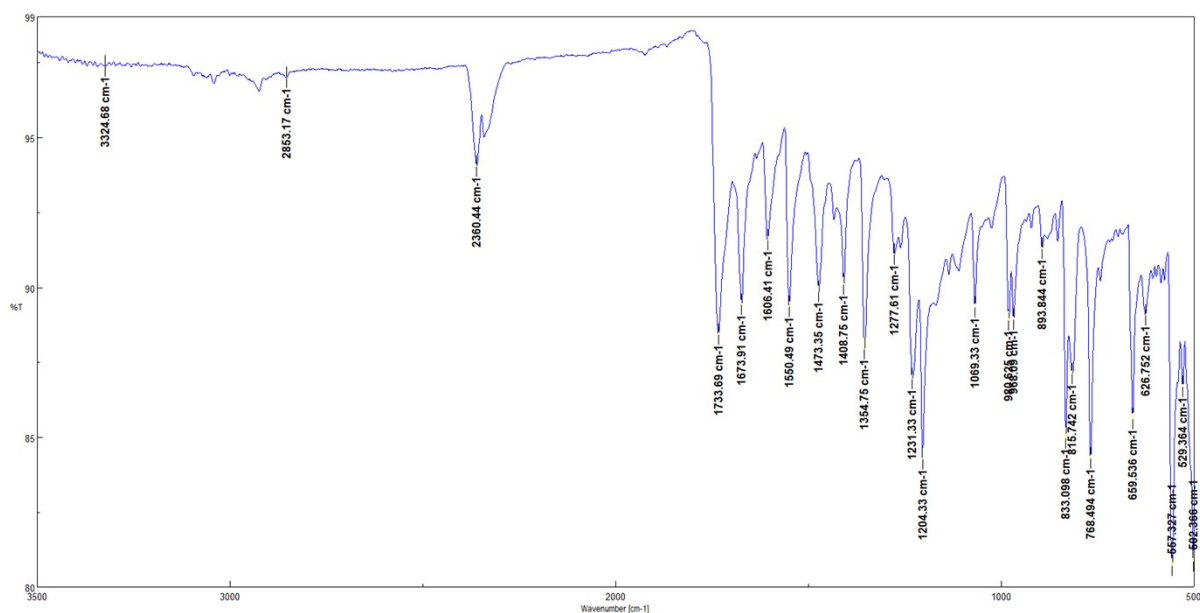

**Fig. S34. FTIR Spectra of compound 5i**

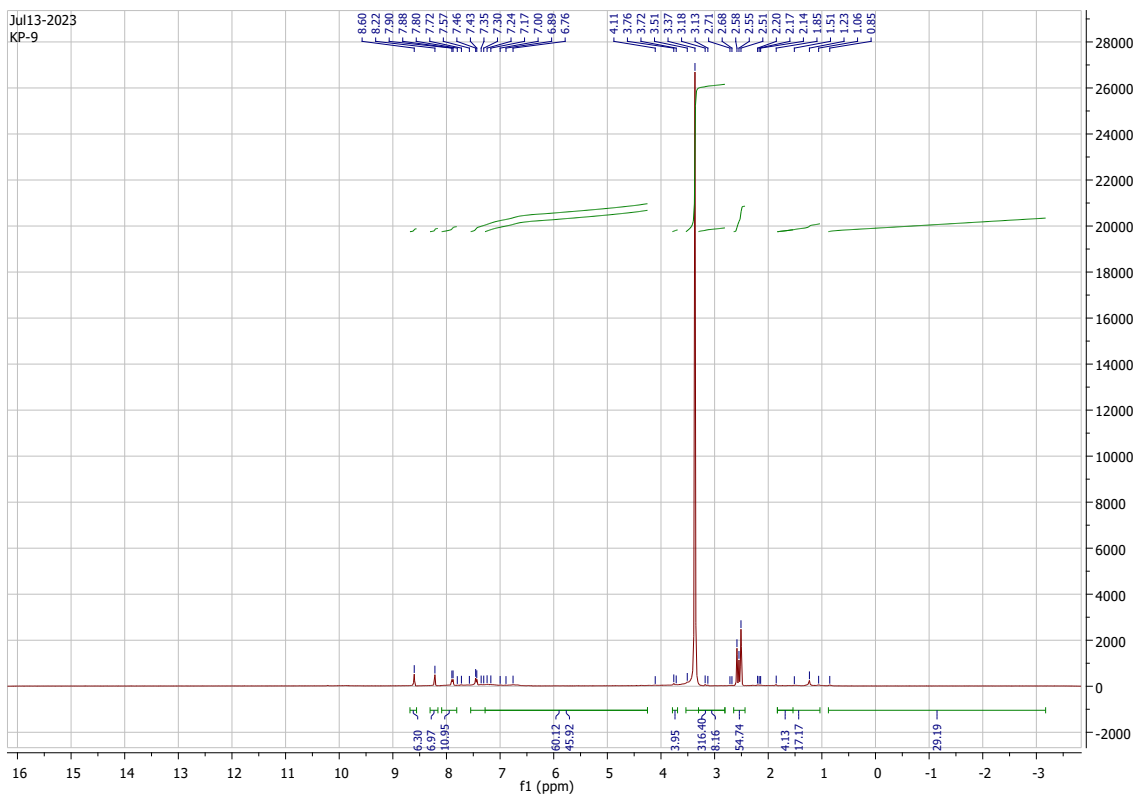

**Fig. S35. <sup>1</sup>H NMR Spectra of compound 5i**

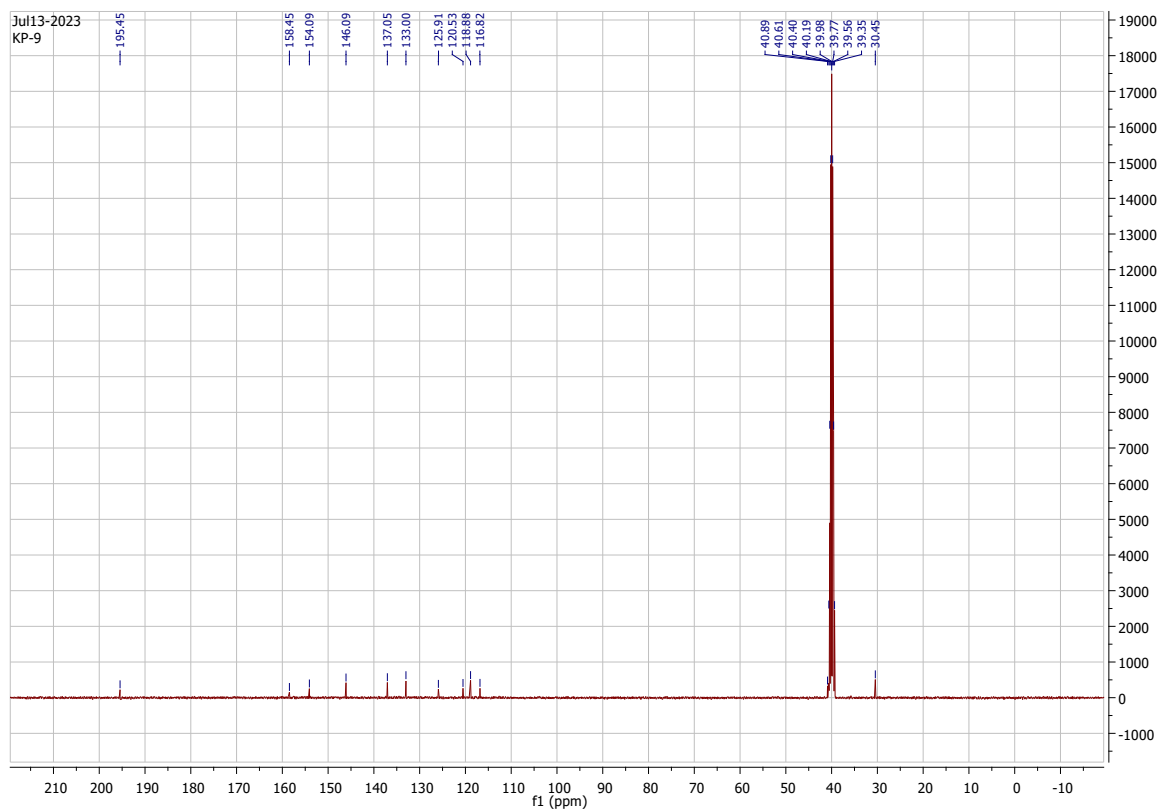

**Fig. S36. <sup>13</sup>C NMR Spectra of compound 5i**

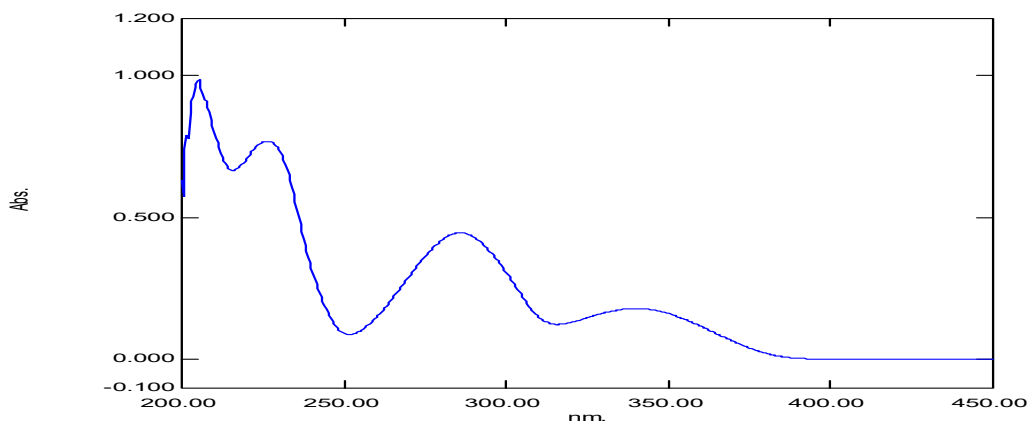

**Fig. S37. UV-Visible spectra of compound 7a**

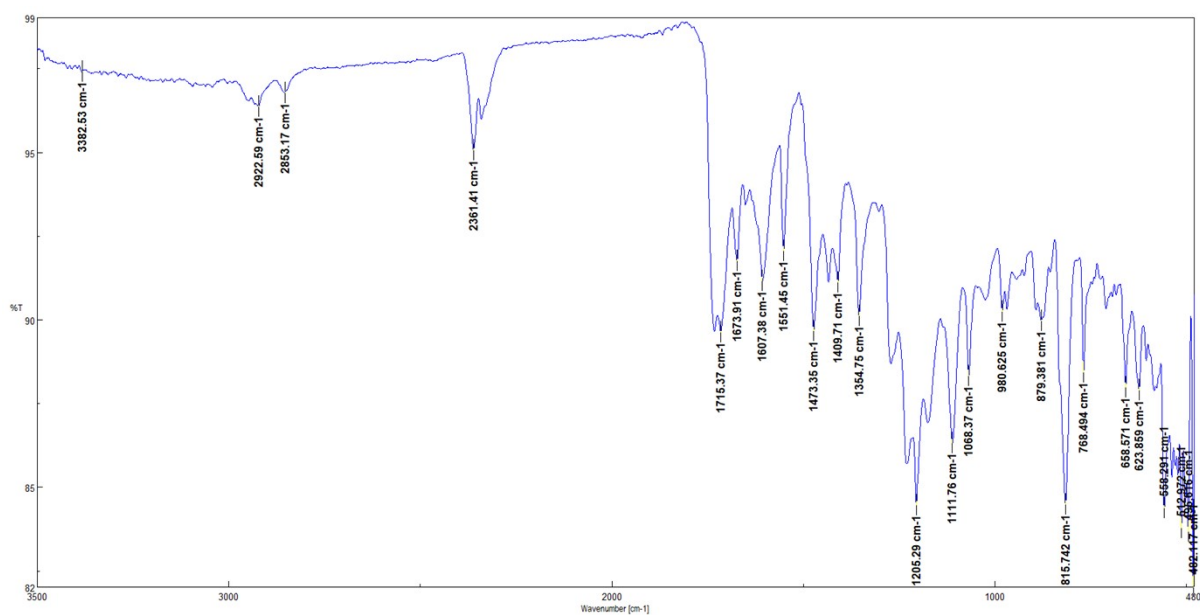

**Fig. S38. FT-IR Spectra of compound 7a**

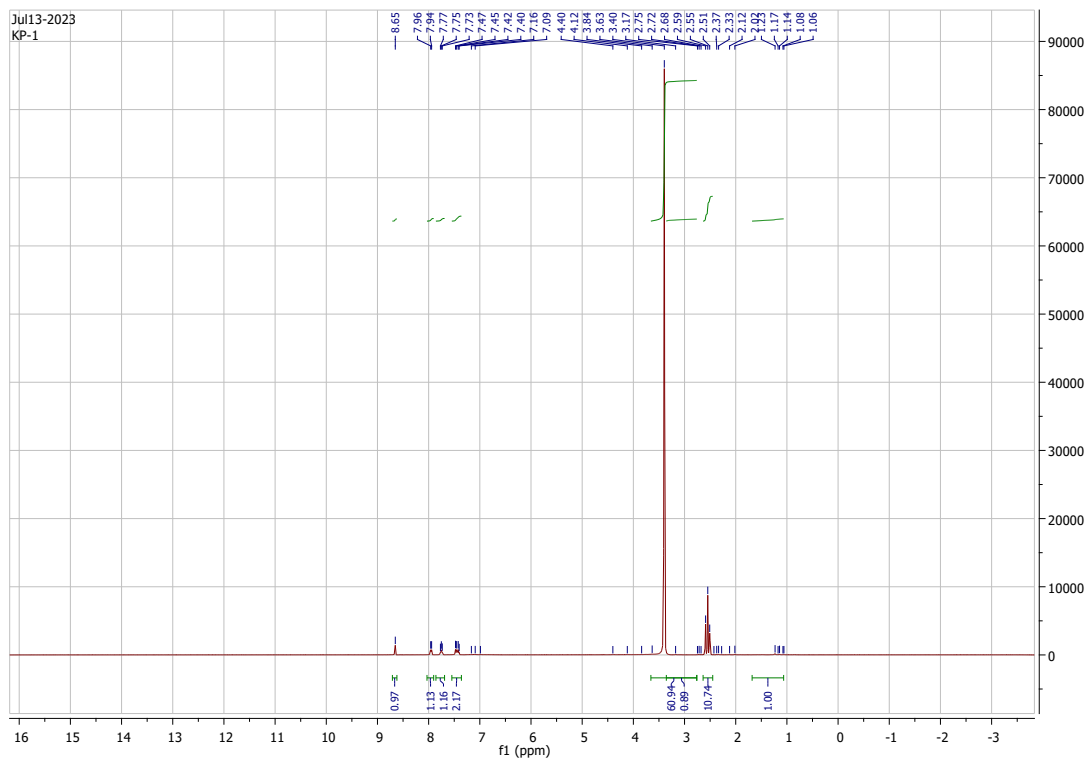

**Fig. S39.**  $^1\text{H}$  NMR Spectra of compound 7a

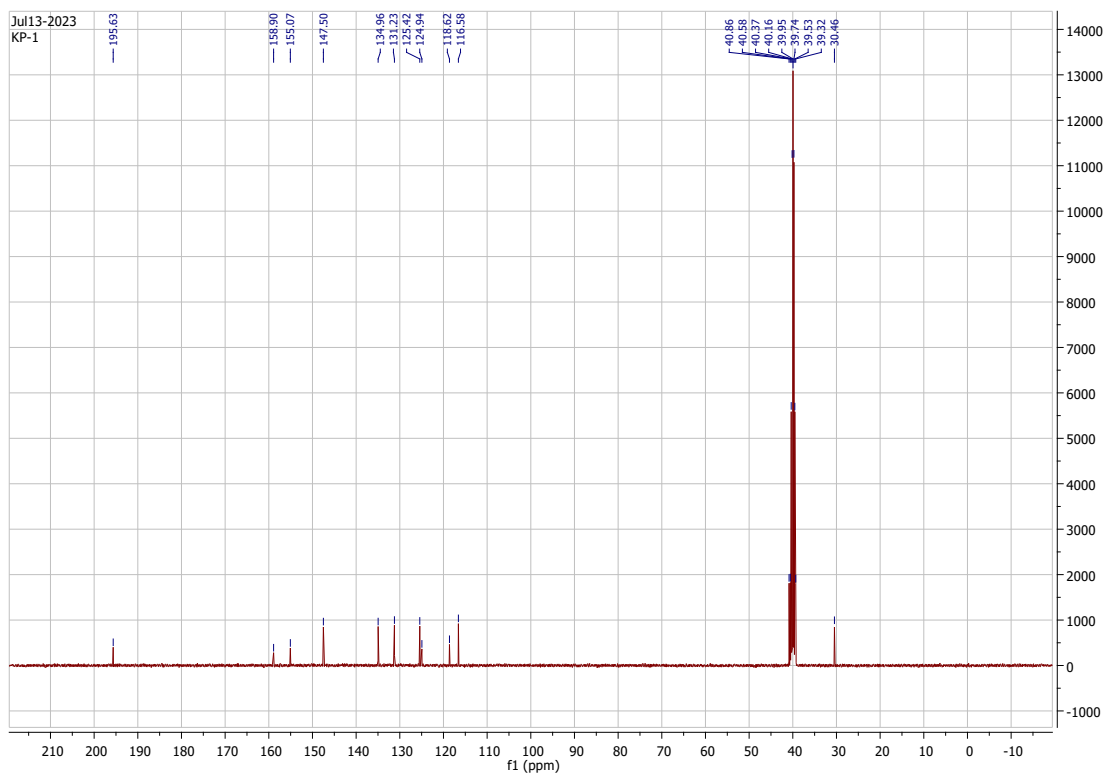

**Fig. S40.**  $^{13}\text{C}$  NMR Spectra of compound 7a

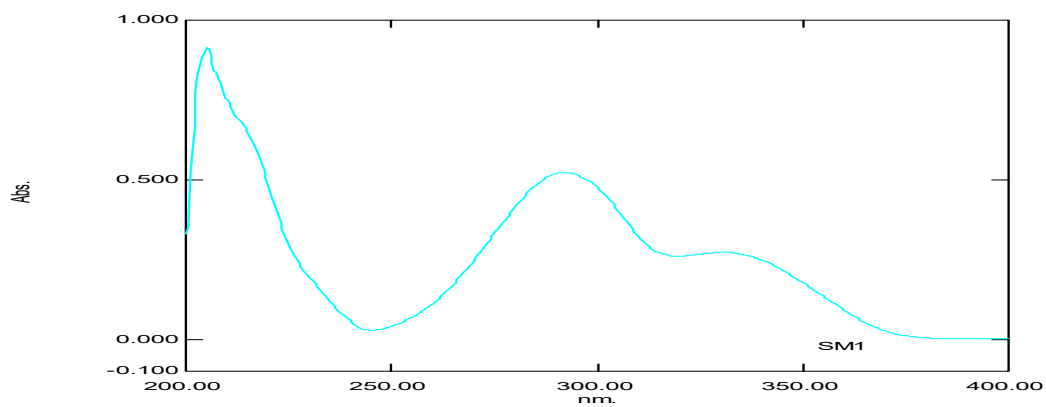

Fig. S41. UV-Visible spectra of compound 7b

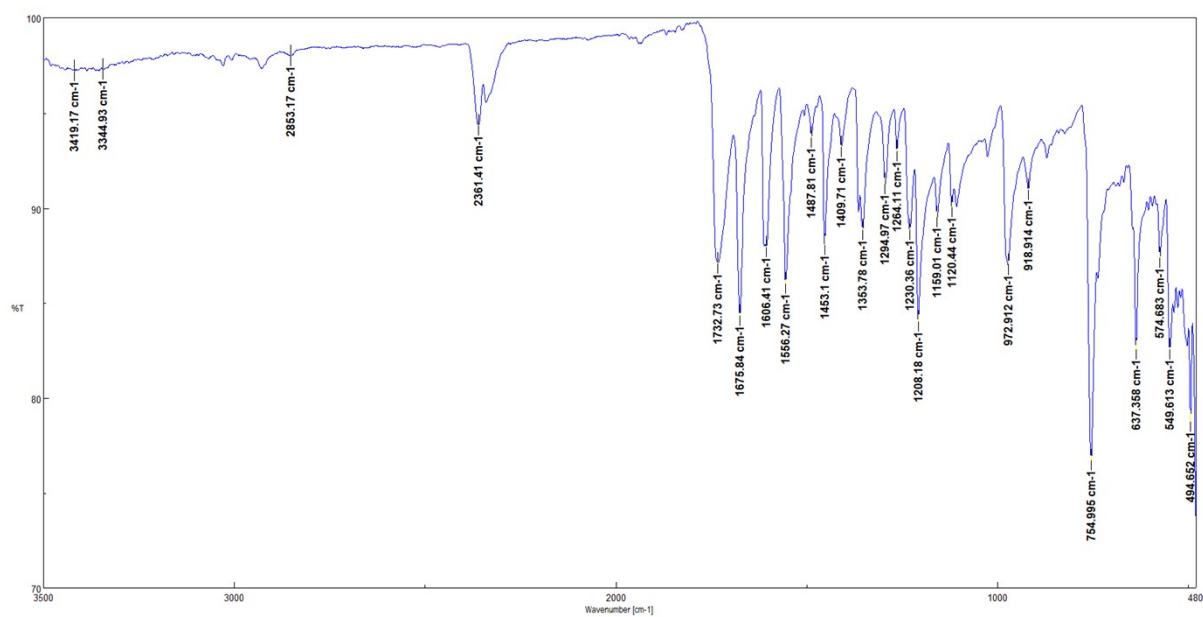

Fig. S42. FTIR Spectra of compound 7b

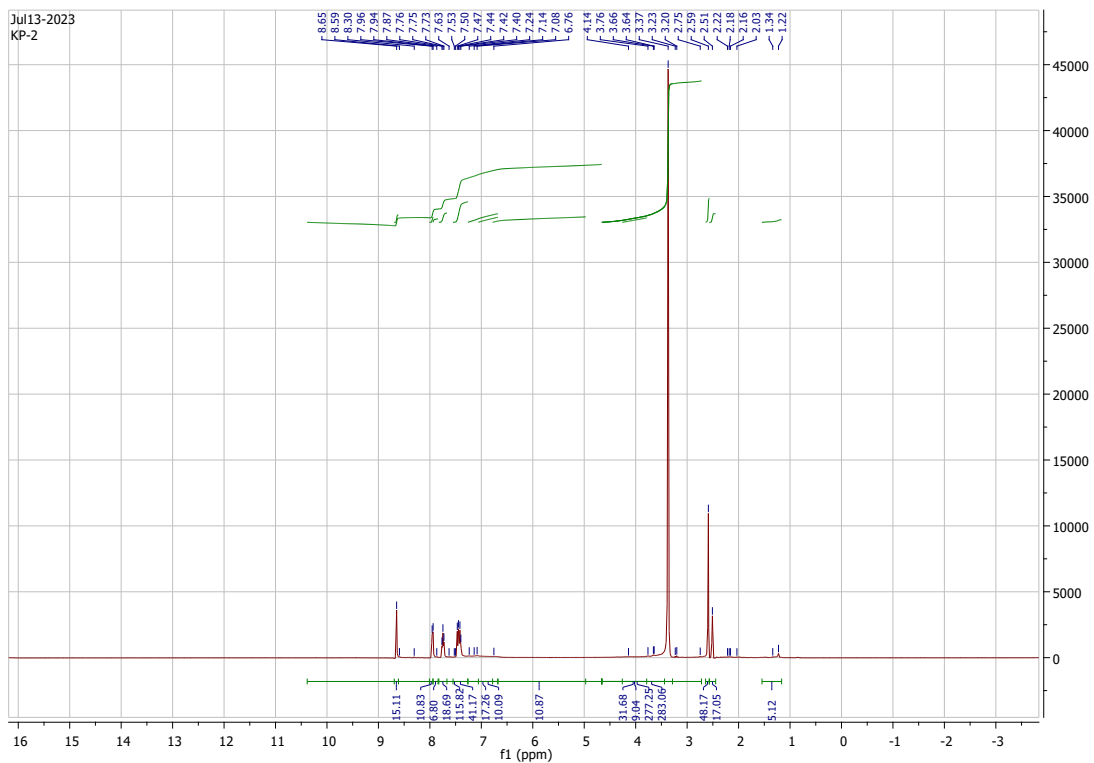

**Fig. S43.  $^1\text{H}$  NMR Spectra of compound 7b**

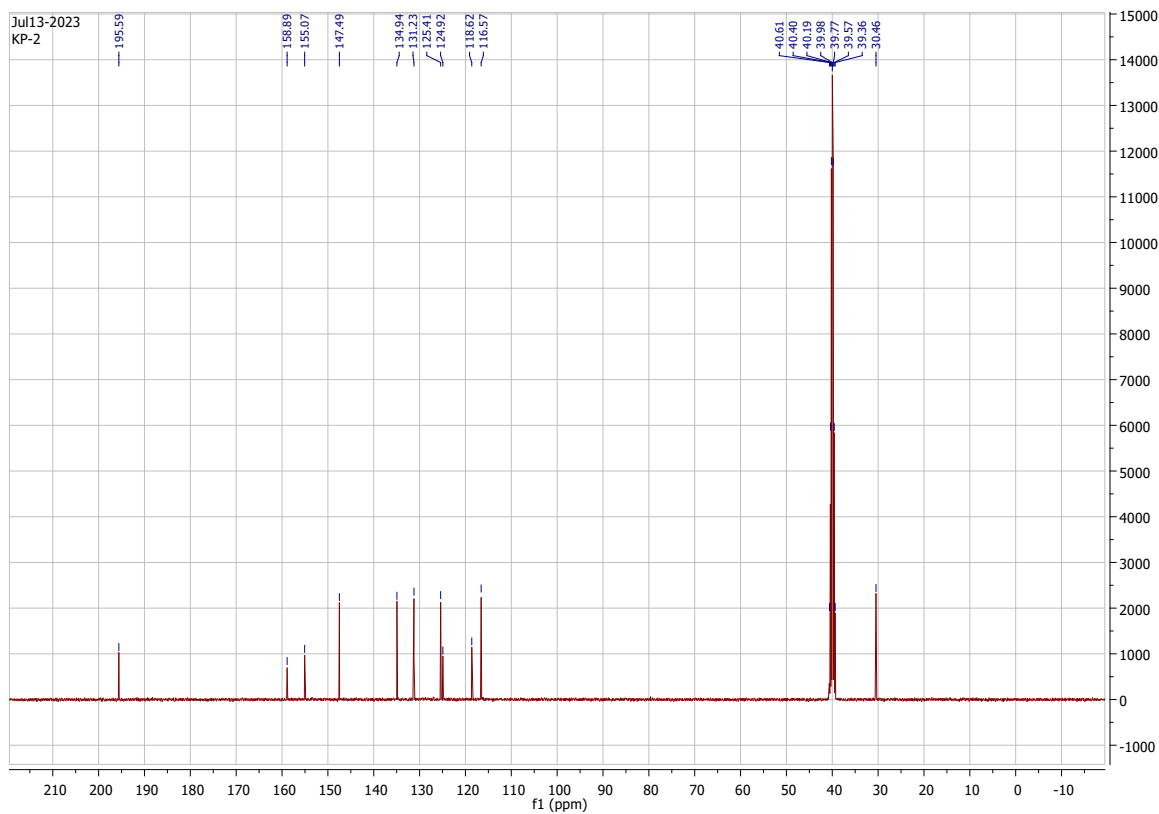

**Fig. S44.  $^{13}\text{C}$  NMR Spectra of compound 7b**

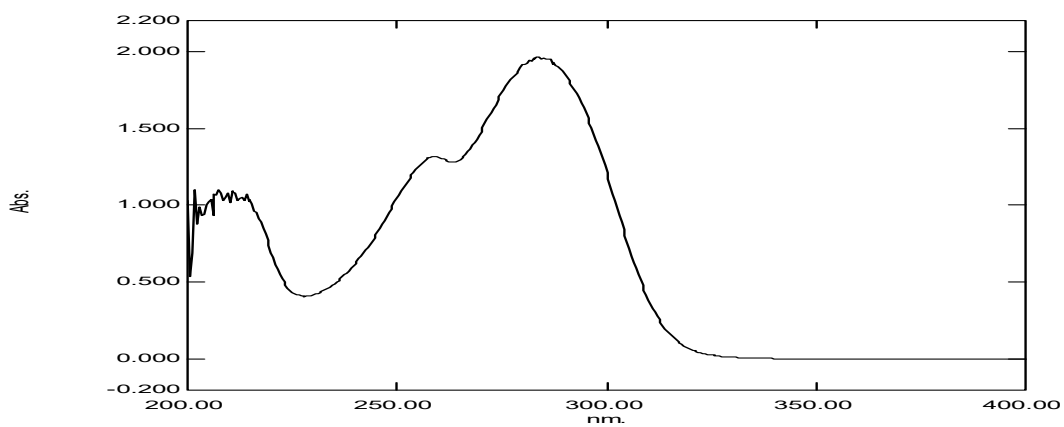

Fig. S45. UV-Visible spectra of compound 7c

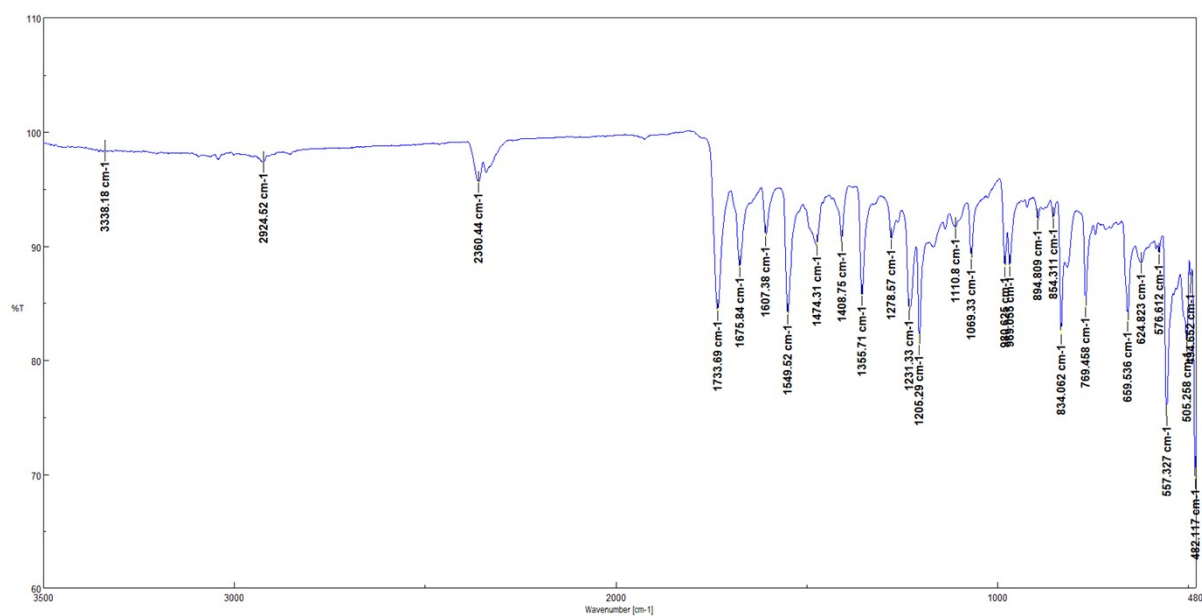

Fig. S46. FTIR Spectra of compound 7c



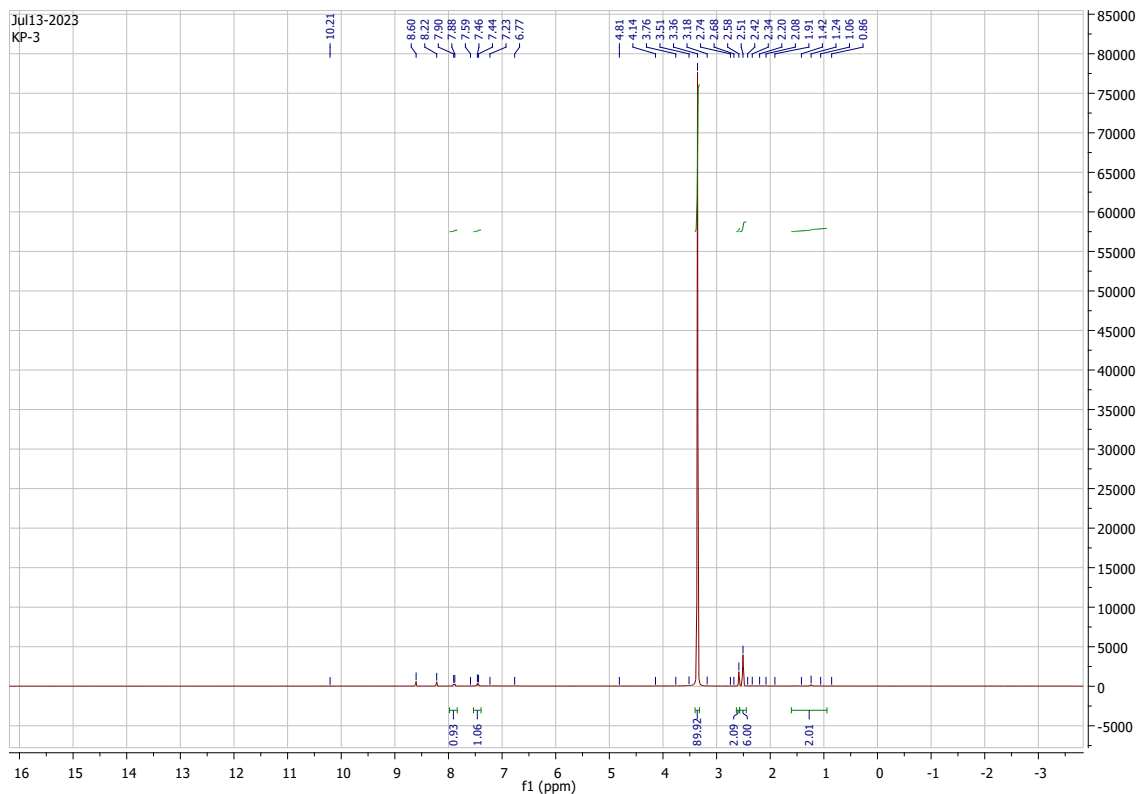

Fig. S47.  $^1\text{H}$  NMR Spectra of compound **7c**

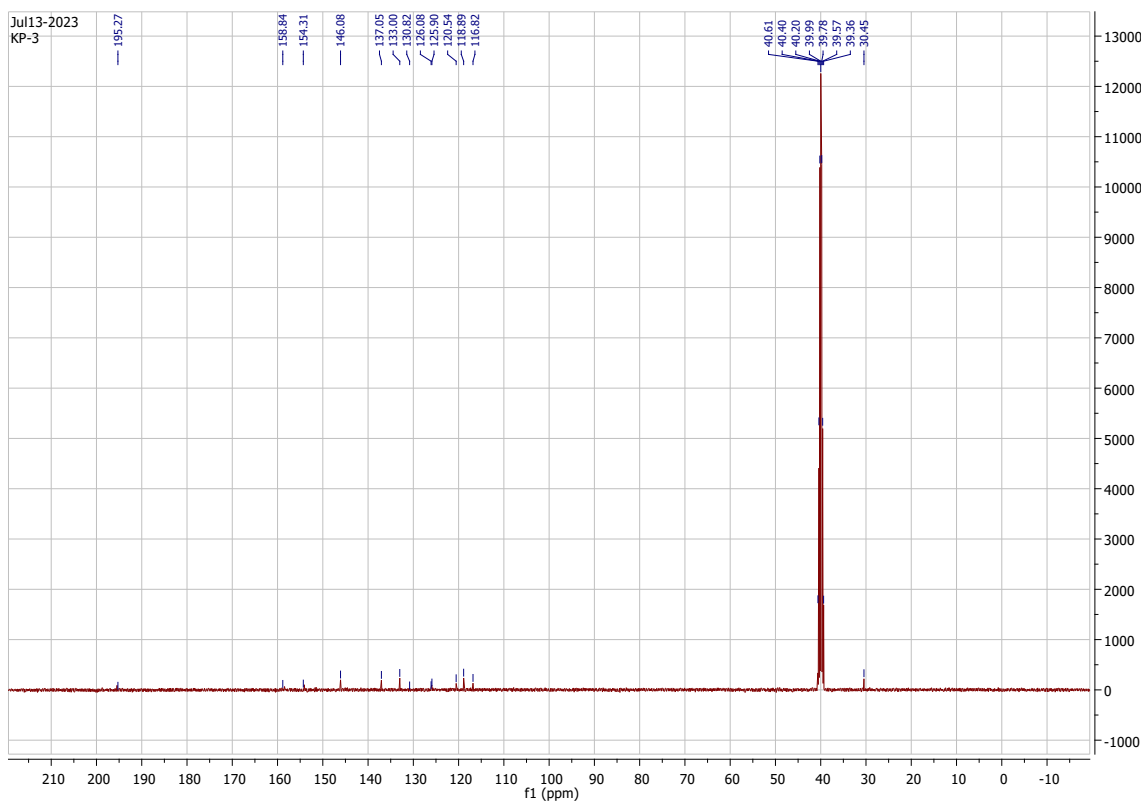

Fig. S48.  $^{13}\text{C}$  NMR Spectra of compound **7c**

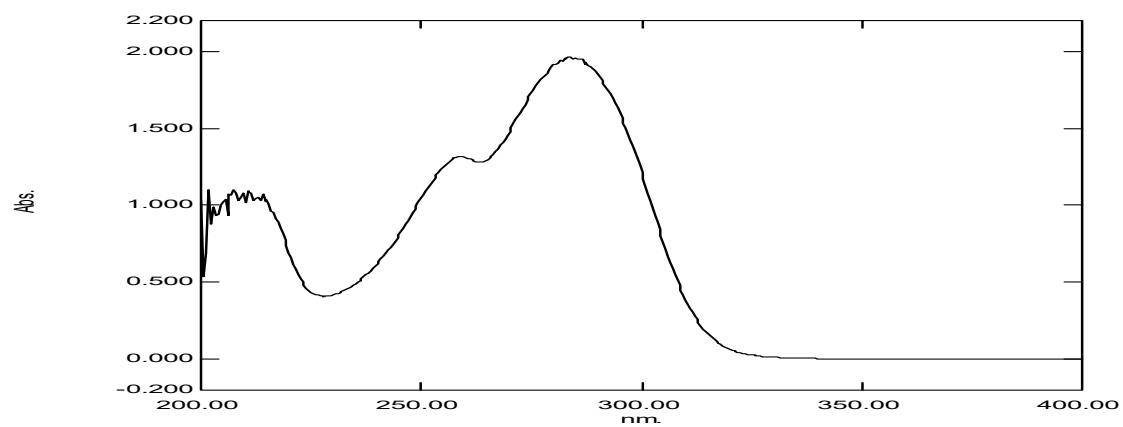

**Fig. S49. UV-Visible spectra of compound 7d**

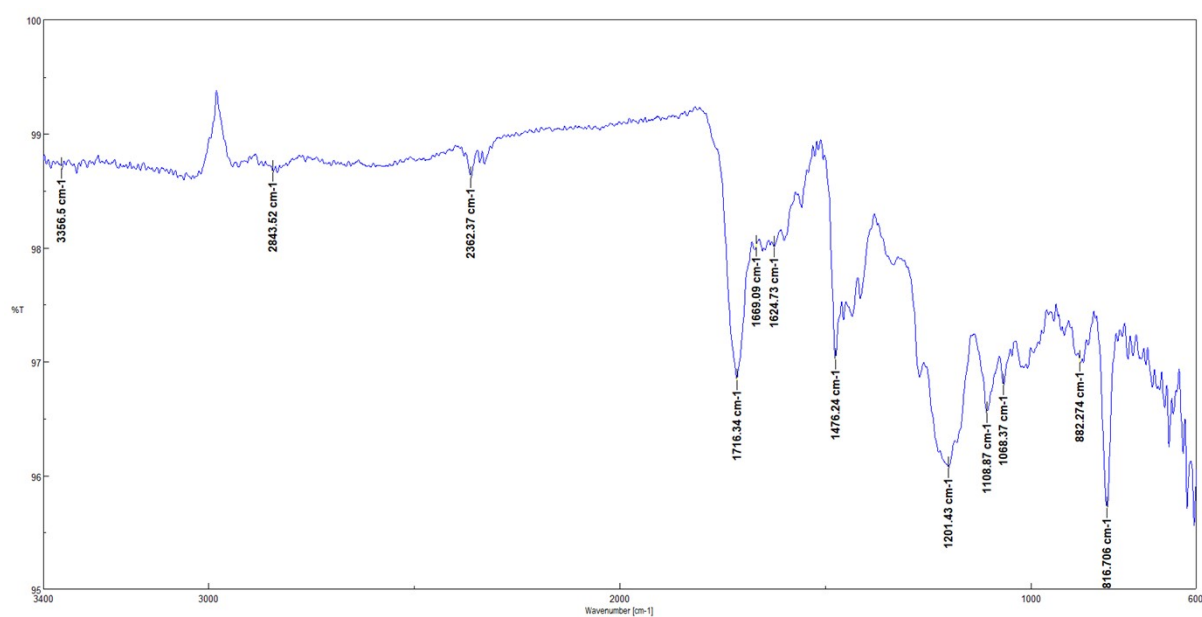

**Fig. S50. FTIR Spectra of compound 7d**

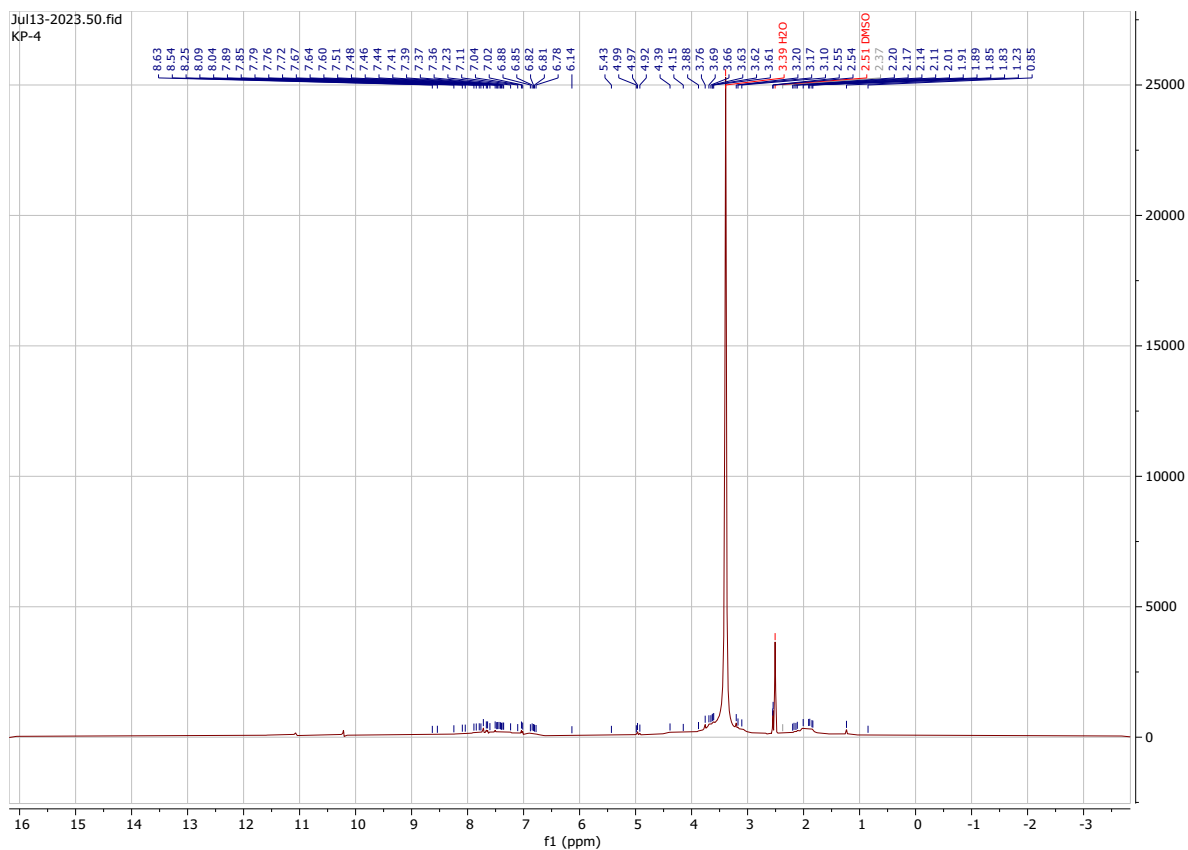

Fig. S51.  $^1\text{H}$  NMR Spectra of compound 7d

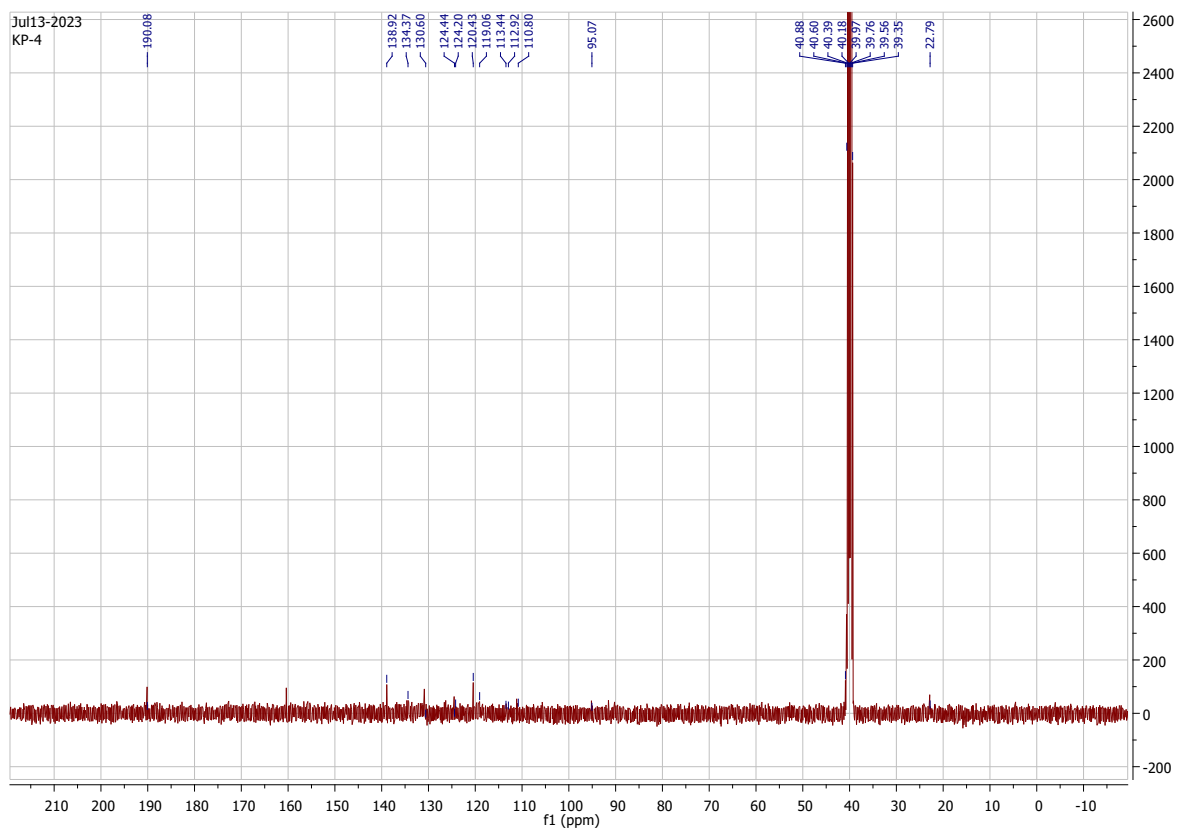

Fig. S52.  $^{13}\text{C}$  NMR Spectra of compound 7d

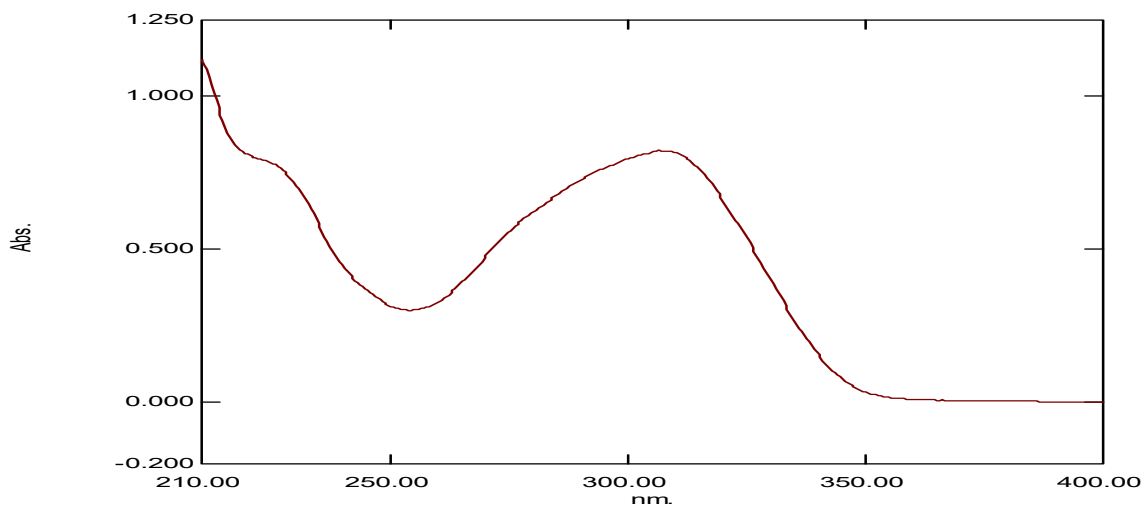

Fig. S53. UV-Visible spectra of compound 7e

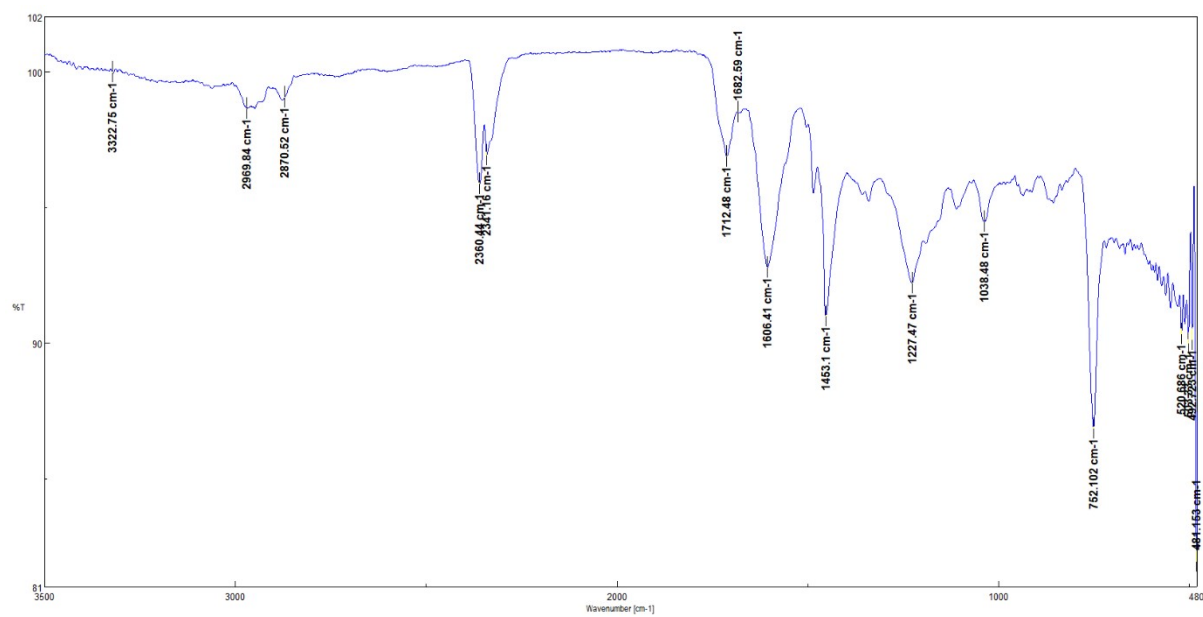

Fig. S54. FTIR Spectra of compound 7e

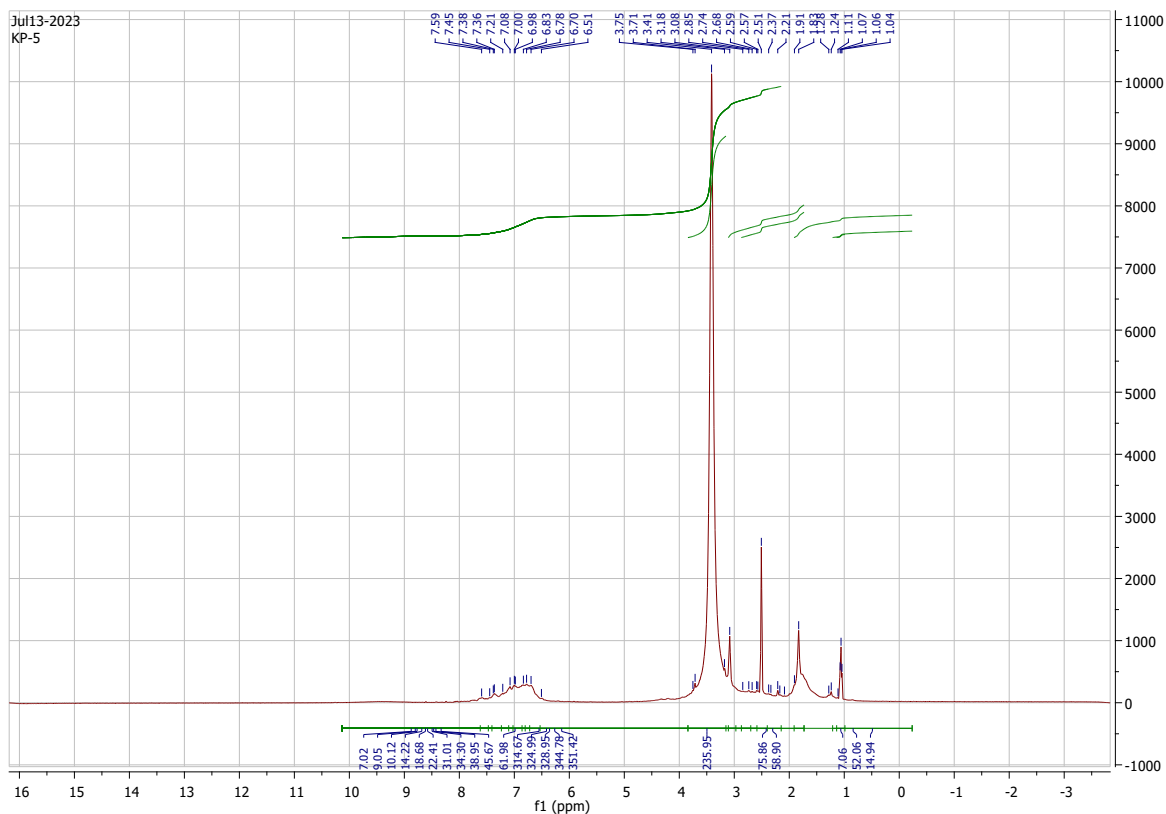

Fig. S55.  $^1\text{H}$  NMR Spectra of compound 7e

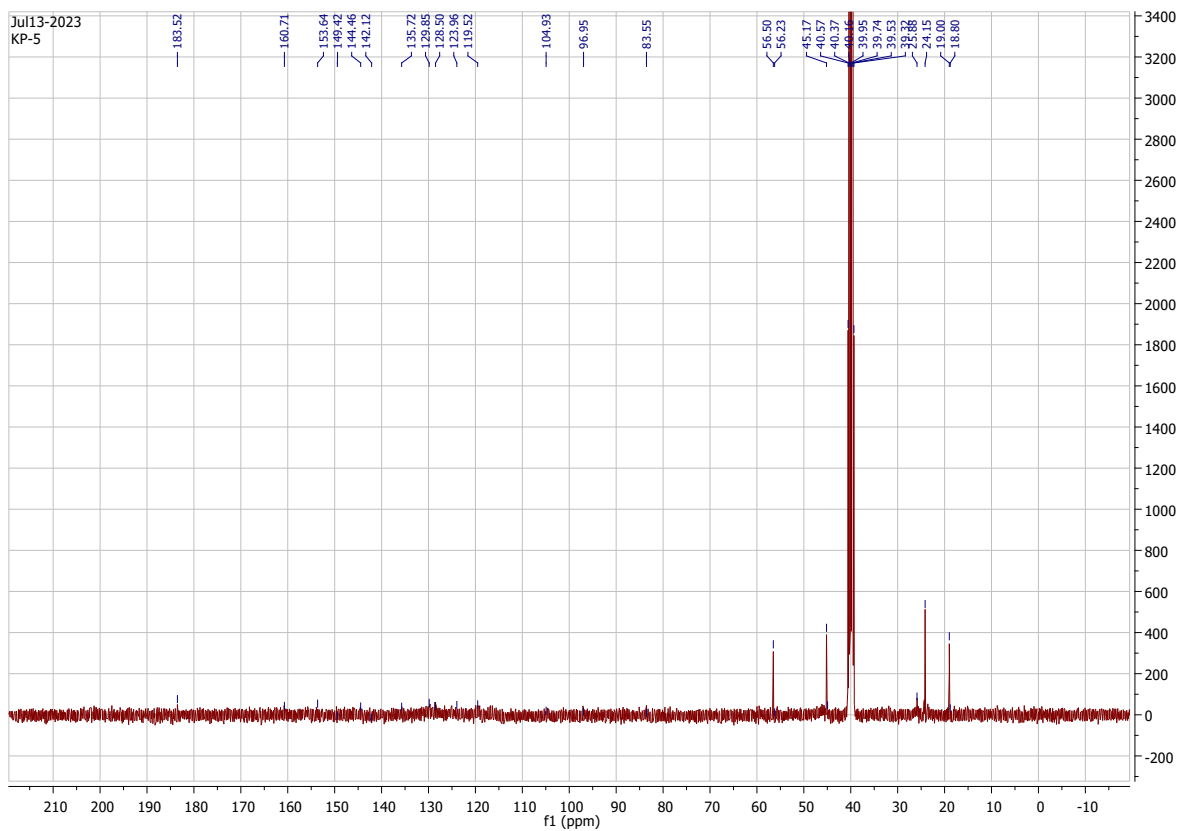

Fig. S56.  $^{13}\text{C}$  NMR Spectra of compound 7e

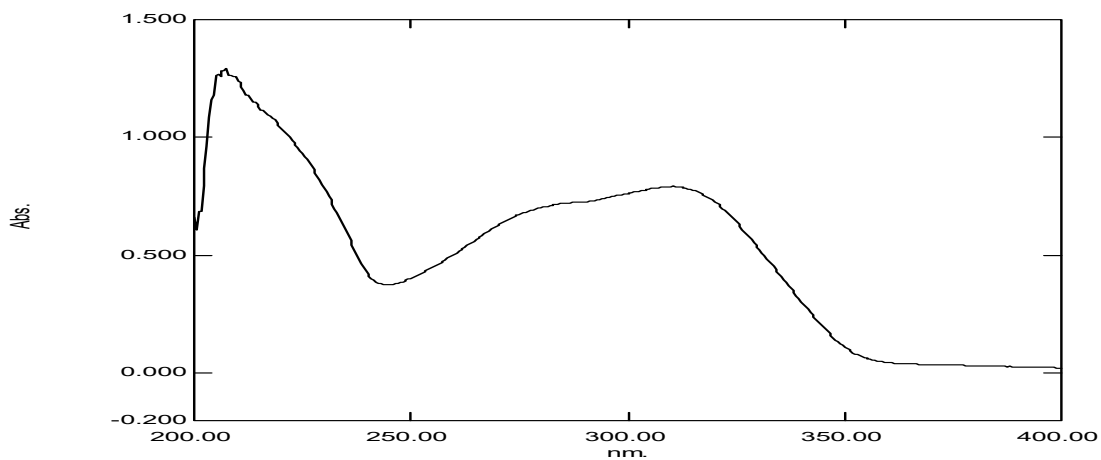

Fig. S57. UV-Visible spectra of compound 7f

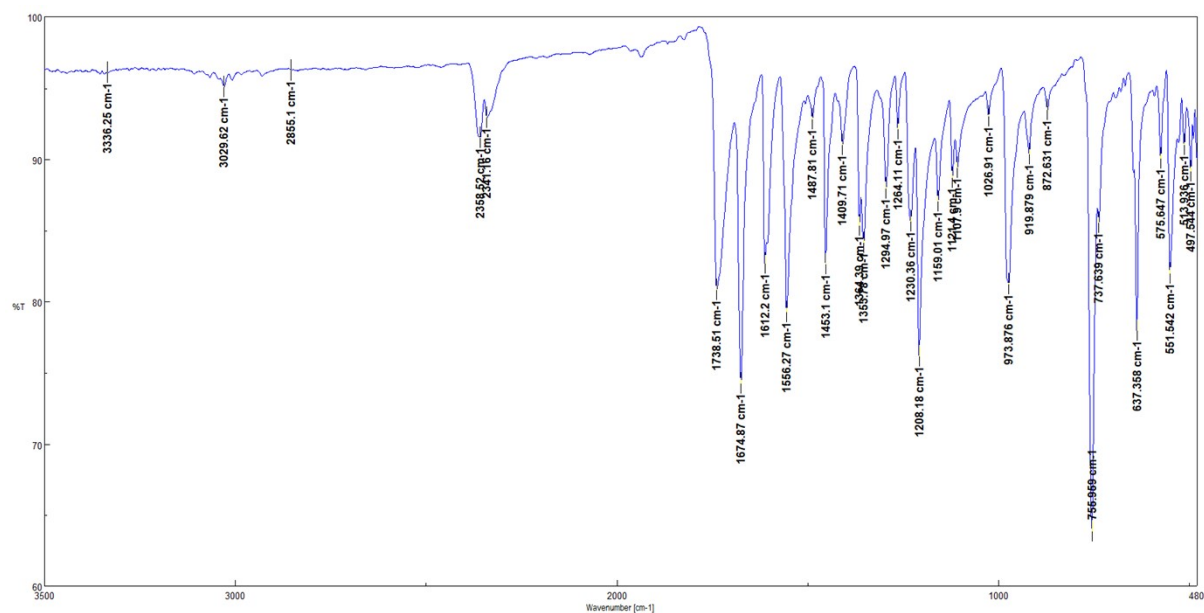

Fig. S58. FTIR Spectra of compound 7f

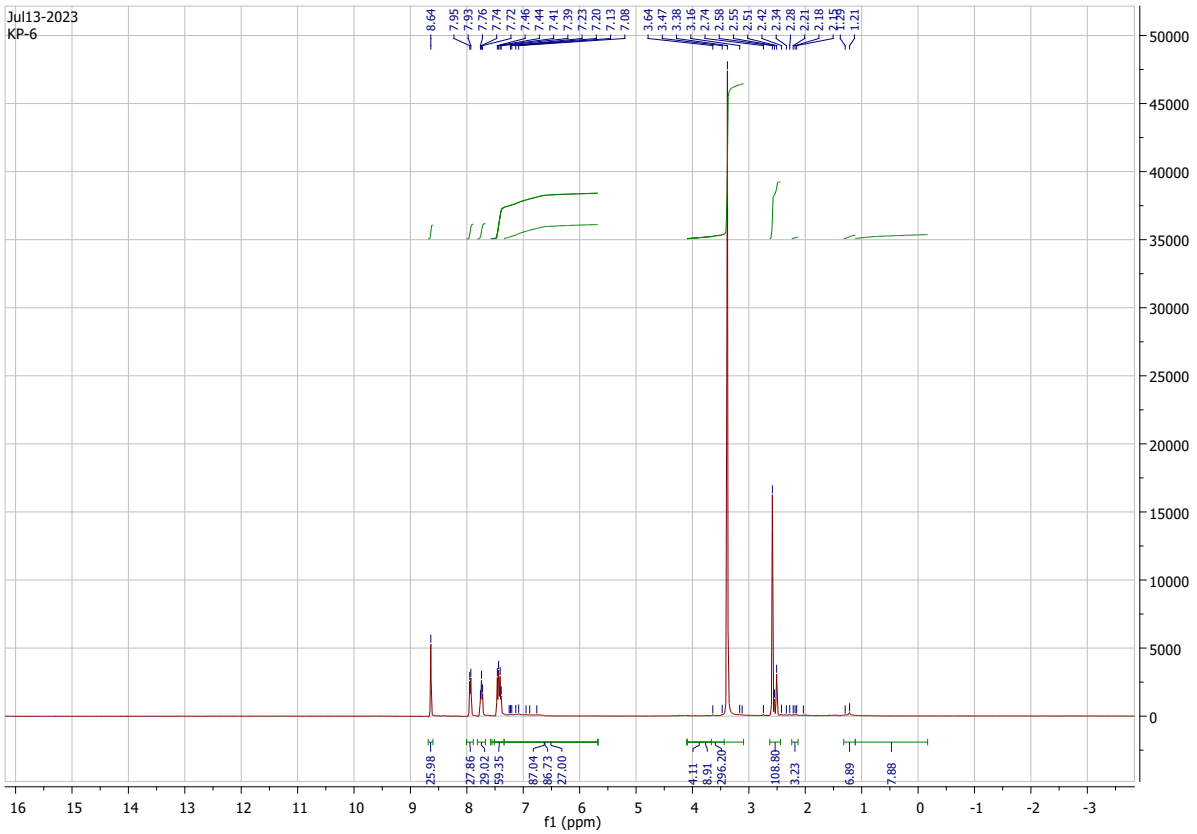

**Fig. S59.**  $^1\text{H}$  NMR Spectra of compound **7f**

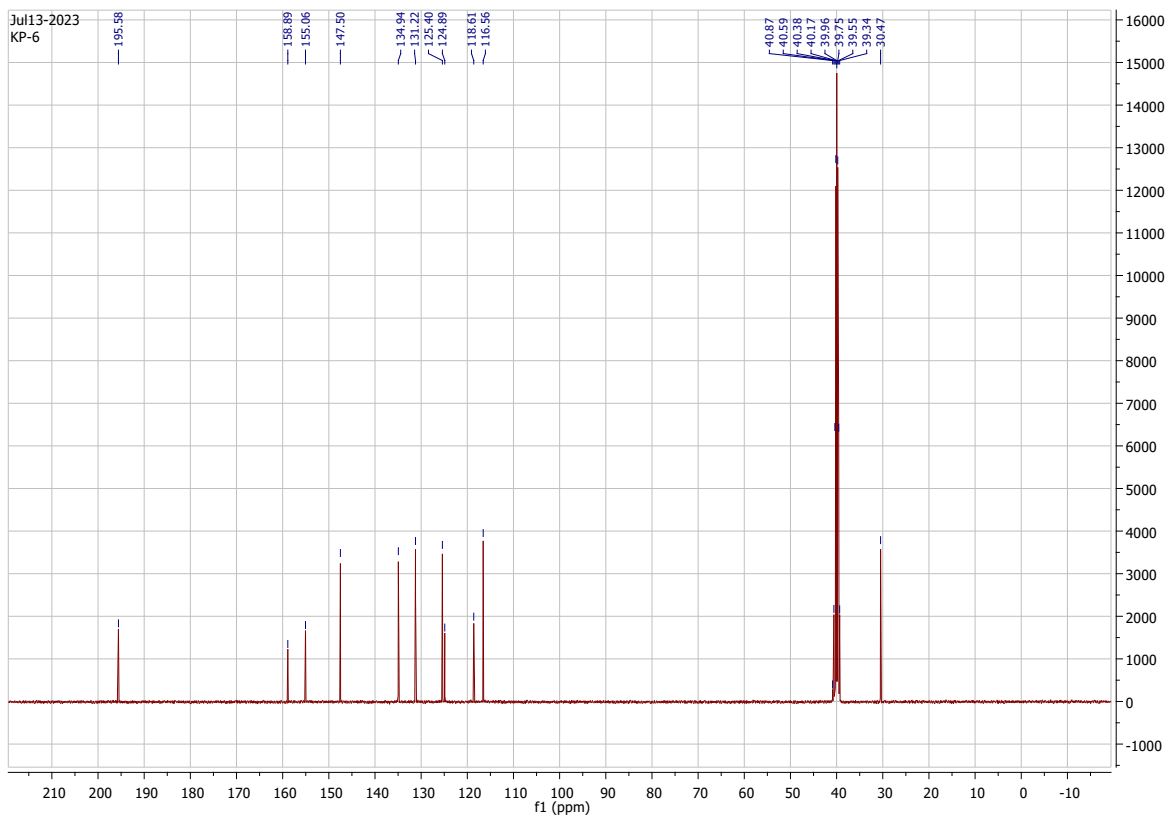

**Fig. S60.**  $^{13}\text{C}$  NMR Spectra of compound **7f**

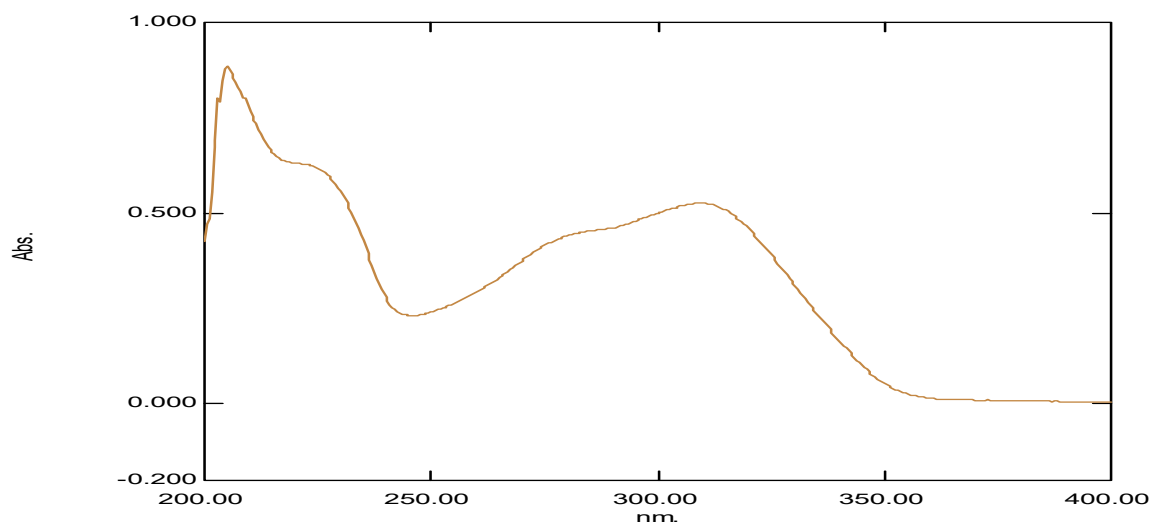

Fig. S61. UV-Visible spectra of compound 7g

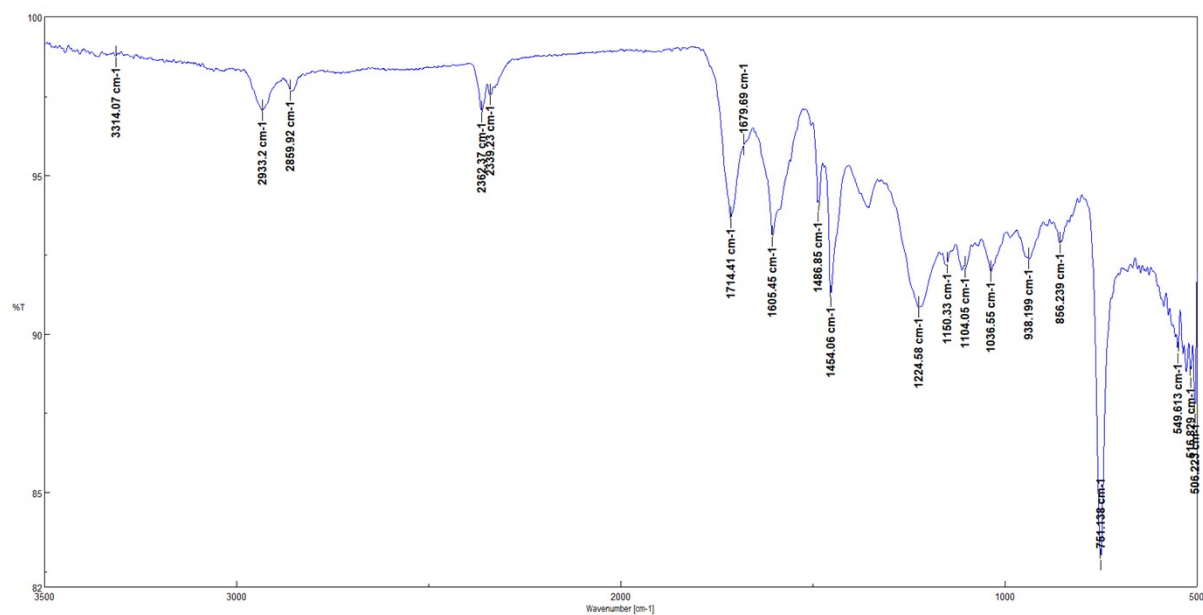

Fig. S62. FTIR Spectra of compound 7g



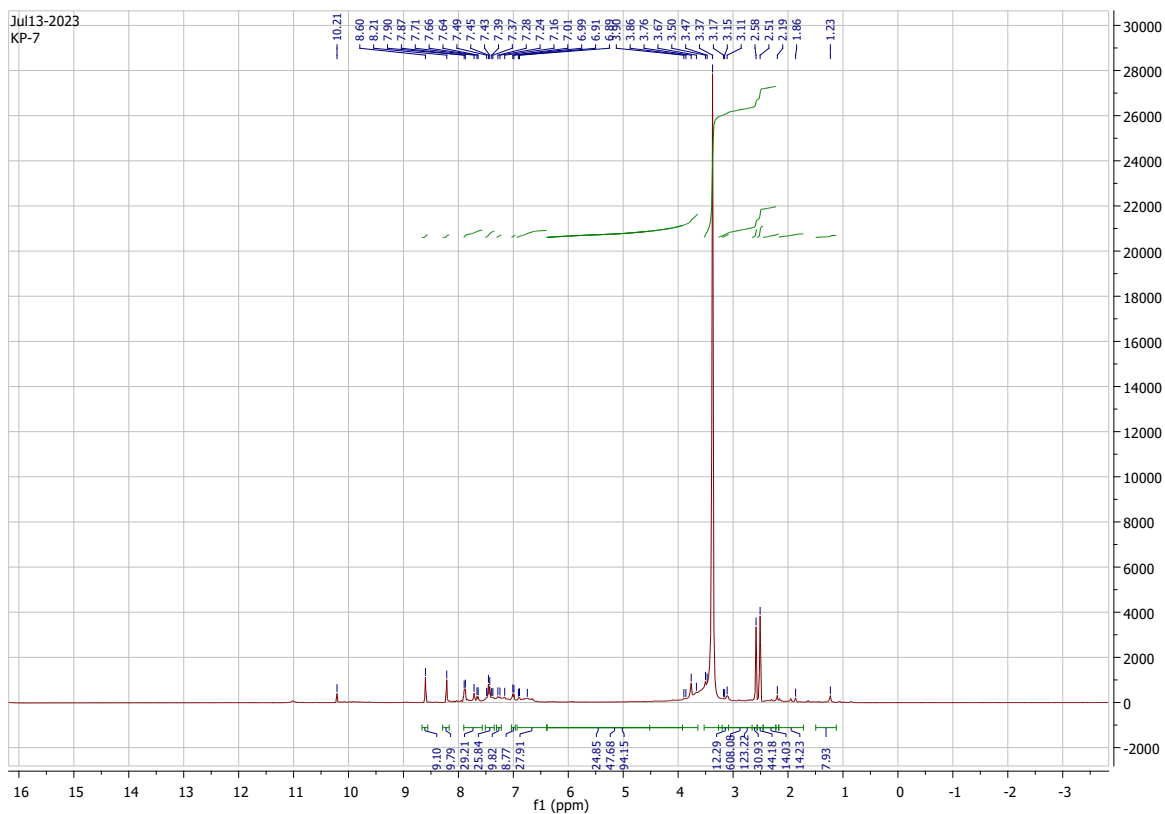

**Fig. S63.  $^1\text{H}$  NMR Spectra of compound 7g**

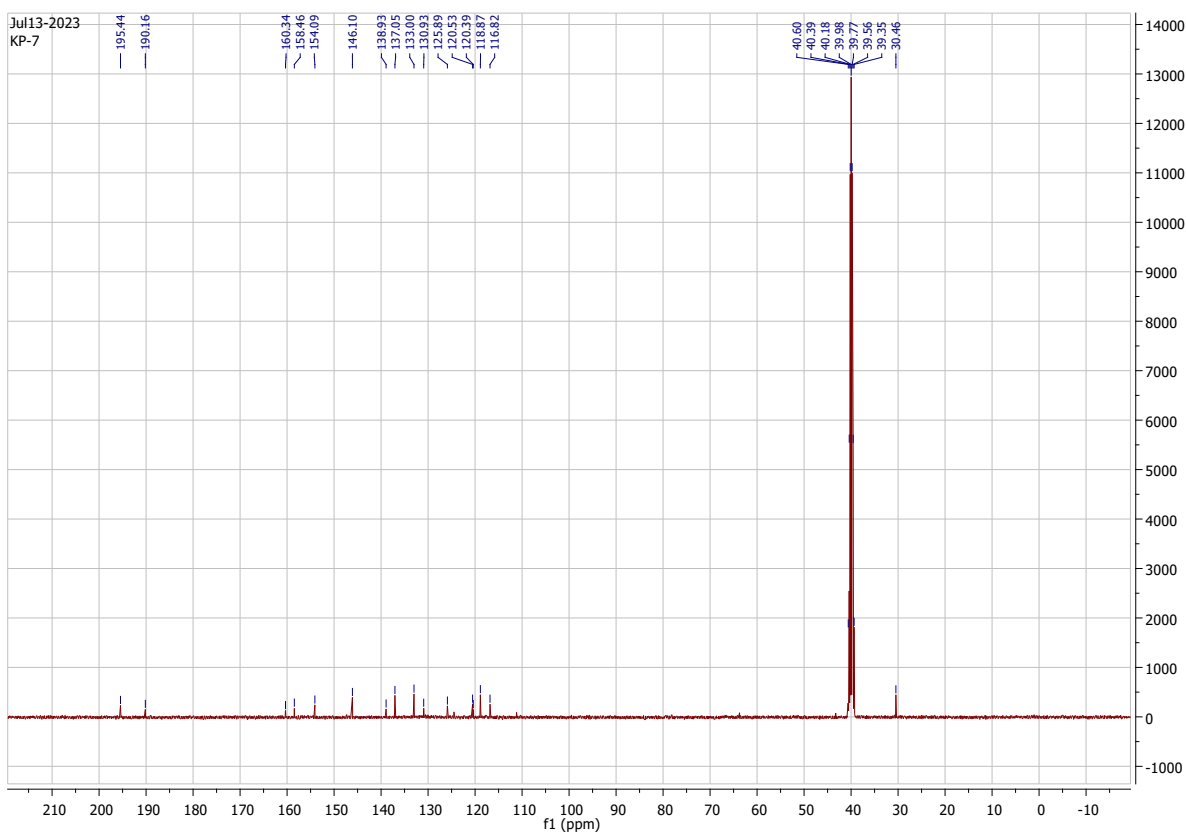

**Fig. S64.  $^{13}\text{C}$  NMR Spectra of compound 7g**

## Antimicrobial assessment

### Zone of Inhibition of compounds 5d & 5f

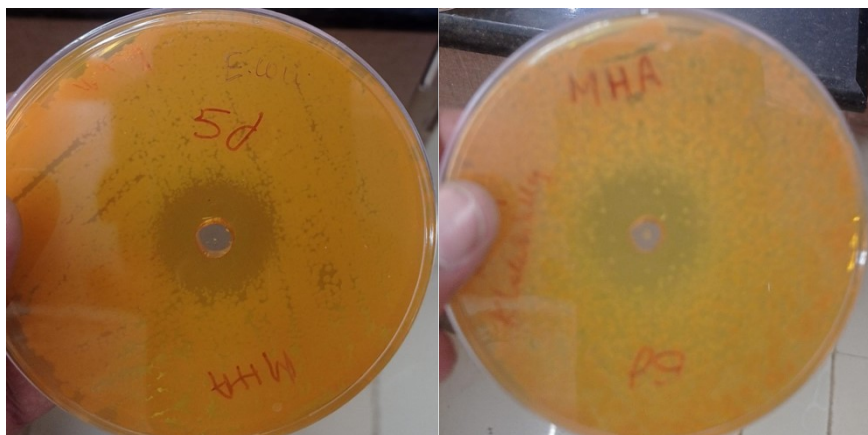

Fig. S65. Zone of Inhibition of compounds 5d & 5f

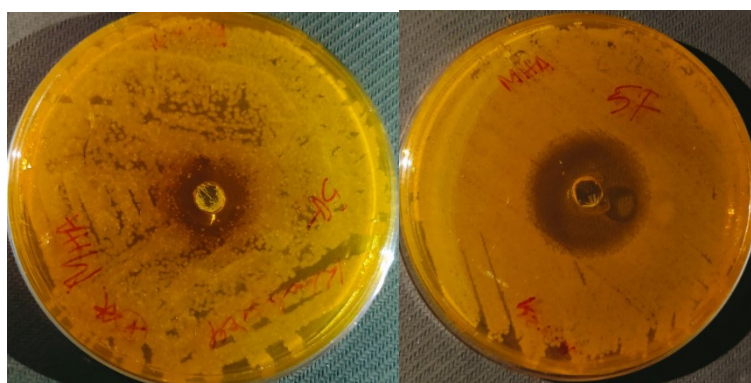

Fig. S66. Zone of Inhibition of compounds 5d & 5f

### Serial dilution method

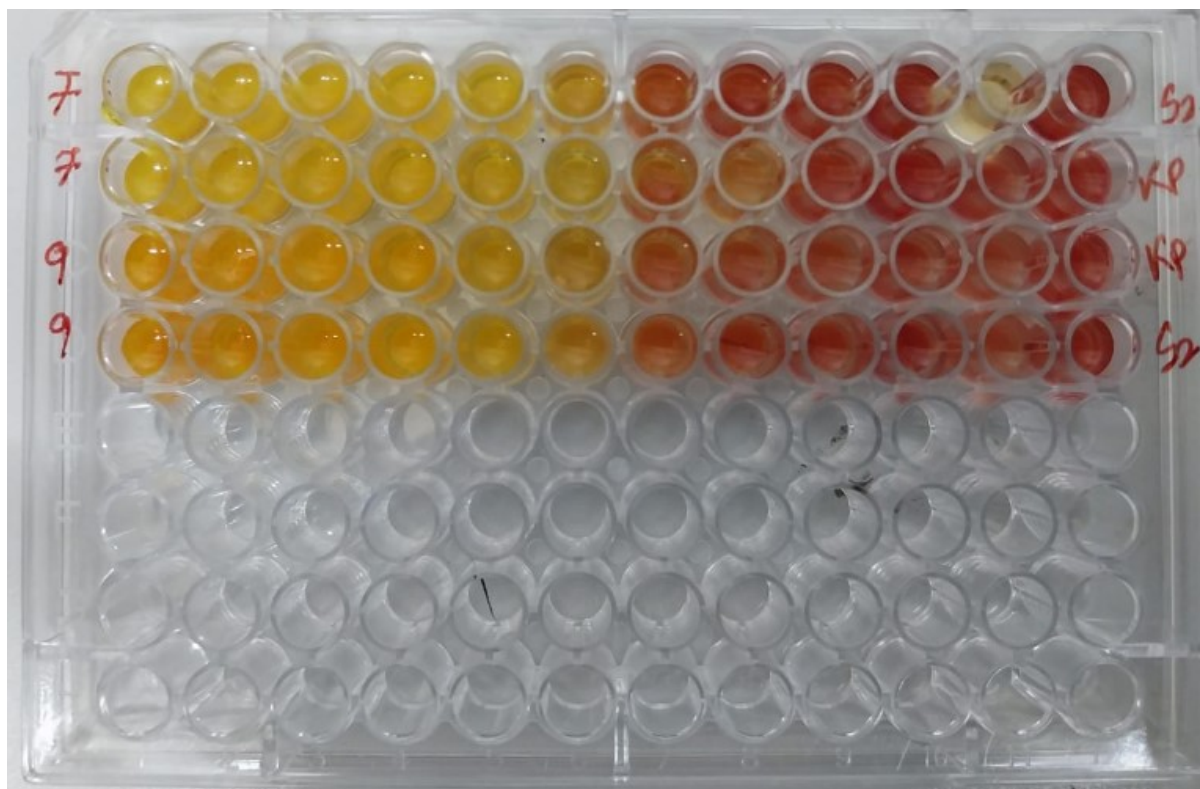

Fig. S67. Minimum Inhibitory Concentration of compounds 5d & 5f

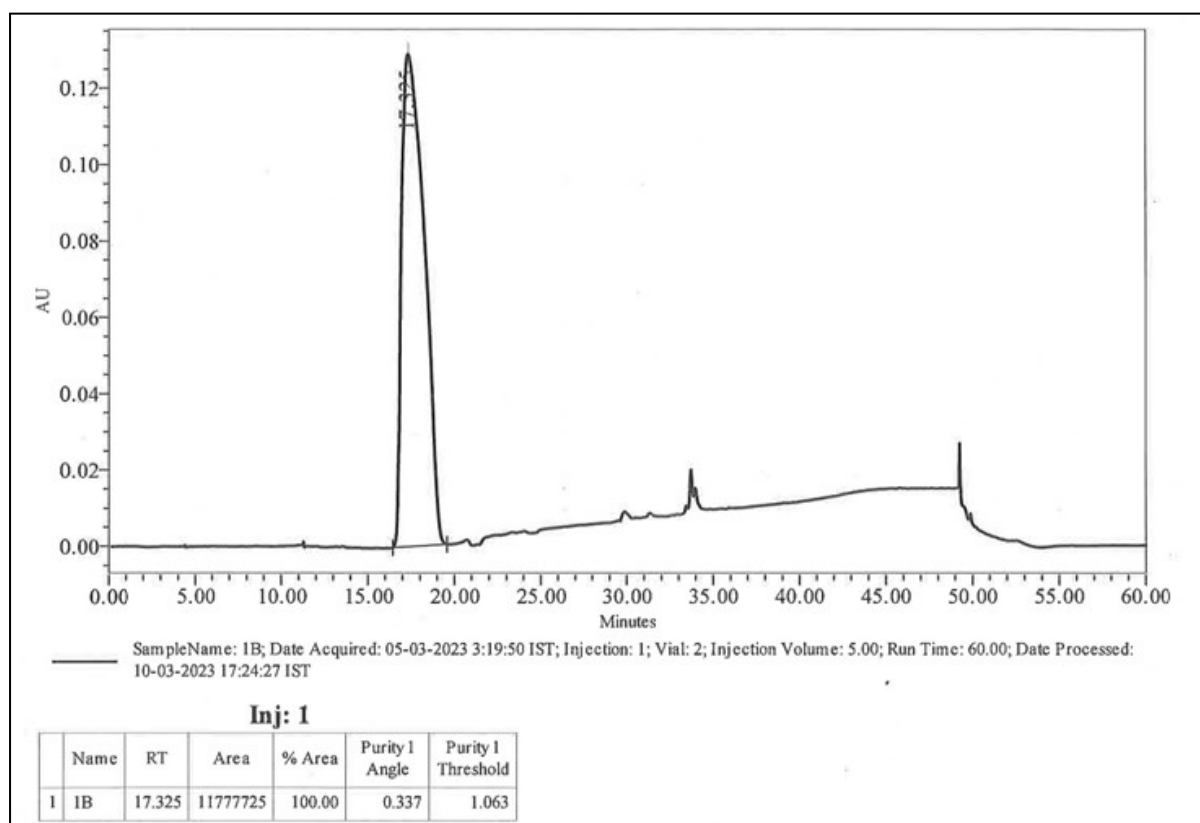

Fig. S68. HPLC chromatogram of compound 5d
